# Supplementary material for: Selective geranylation of biflavonoids by Aspergillus terreus aromatic prenyltransferase (AtaPT)
Source: Royal Society of Chemistry journal article supplement (doi:10.1039/c9ob02296a), 2019-11-20
Supplement: c9ob02296a1.pdf [file c9ob02296a1.pdf]

## Supporting Information

### **Selective geranylation of biflavonoids by *Aspergillus terreus* aromatic prenyltransferase AtaPT**

Kangping Xu,<sup>a</sup> Can Yang,<sup>a</sup> Yuanyuan Xu,<sup>a</sup> Dan Li,<sup>a</sup> Shumin Bao,<sup>a</sup> Zhenxing Zou,<sup>a</sup>  
Fenghua Kang,<sup>a</sup> Guishan Tan,<sup>ab</sup> Shu-Ming Li<sup>c</sup> and Xia Yu<sup>\*a</sup>

---

<sup>a</sup> School of Pharmaceutical Sciences, Central South University, Changsha, Hunan 410013, People's Republic of China. E-mail: xyu226@csu.edu.cn

<sup>b</sup> Xiangya Hospital of Central South University, Changsha 410008, People's Republic of China.

<sup>c</sup> Institut für Pharmazeutische Biologie und Biotechnologie, Philipps-Universität Marburg, Robert-Koch Straße 4, 35037 Marburg, Germany.

# Table of Contents

## Experimental Procedures

|                                                                                      |   |
|--------------------------------------------------------------------------------------|---|
| Chemicals .....                                                                      | 1 |
| Plasmid construction, protein overproduction in <i>E.coli</i> and purification ..... | 1 |
| Enzyme assays .....                                                                  | 2 |
| HPLC conditions for analysis and isolation .....                                     | 2 |
| Protein sequence of his <sub>6</sub> -tagged AtaPT .....                             | 2 |

## Supplementary Tables and Figures

|                                                                                                                        |       |
|------------------------------------------------------------------------------------------------------------------------|-------|
| Table S1: HR-ESI-MS data of compounds <b>1a-4a</b> .....                                                               | 4     |
| Table S2: <sup>1</sup> H NMR and <sup>13</sup> C NMR data of <b>1a</b> in DMSO- <i>d</i> <sub>6</sub> .....            | 5     |
| Table S3: <sup>1</sup> H NMR and <sup>13</sup> C NMR data of <b>2a</b> in DMSO- <i>d</i> <sub>6</sub> .....            | 7     |
| Table S4: <sup>1</sup> H NMR data of <b>3a</b> in acetone- <i>d</i> <sub>6</sub> and DMSO- <i>d</i> <sub>6</sub> ..... | 9     |
| Table S5: <sup>1</sup> H NMR and <sup>13</sup> C NMR data of <b>4a</b> in DMSO- <i>d</i> <sub>6</sub> .....            | 11    |
| Figure S1: Analysis of purified his <sub>6</sub> -AtaPT on SDS-PAGE .....                                              | 13    |
| Figures S2-S5: HR-ESI-MS spectra of compounds <b>1a-4a</b> .....                                                       | 13-14 |
| Figure S6: Key HMBC and NOESY correlations of AtaPT product <b>1a</b> .....                                            | 14    |
| Figure S7: Key HMBC and NOESY correlations of AtaPT product <b>2a</b> .....                                            | 15    |
| Figure S8: Key NOESY correlations of AtaPT product <b>3a</b> .....                                                     | 15    |
| Figure S9: Key HMBC and NOESY correlations of AtaPT product <b>4a</b> .....                                            | 15    |
| Figures S11-S27: NMR spectra of <b>1a-4a</b> .....                                                                     | 16-33 |
| Reference .....                                                                                                        | 34    |

## Experimental Procedures

### Chemicals

Geranyl diphosphate (GPP) was prepared according to the method described by Woodside.<sup>1</sup>

### Plasmid construction, protein overproduction in *E.coli* and purification

The PCR fragment containing the entire coding sequence of *ataPT* was amplified using primers *ataPT\_F\_NdeI* (5'-ATACATATGCTCCCCCATCAGACA-3') and *ataPT\_R\_XhoI* (5'-ATTCTCGAGTTAGTGGTGATGGTGATGATGCACACGTGCGACATTTCCC -3'), and then digested by restriction enzymes NdeI and XhoI. The NdeI-XhoI fragment was ligated into the NdeI-XhoI linearized pCDFDuet<sup>TM</sup>-1 (Novagen) to yield the *E.coli* expression vector pCDFDuet-*ataPT*. *E.coli* BL21 (DE3) cells harboring the plasmid pCDFDuet-*ataPT* were cultivated in a 2000 ml Erlenmeyer flask containing 500 ml liquid TB medium supplemented with 100 µg/ml streptomycin and grown at 37 °C to the OD value at 600 nm of 0.6. Isopropyl thiogalactoside (IPTG) was added into the culture to a final concentration of 1.5 mM, and the cells were induced at 37°C for 30 h. The bacterial cells were centrifuged and the pellets were resuspended in lysis buffer (10 mM imidazole, 50 mM NaH<sub>2</sub>PO<sub>4</sub>, 300 mM NaCl, pH 8.0) at 2-5 mL per gram wet weight. After sonication on ice, the lysate was centrifuged at 13,000 x g for 30 min at 4 °C to remove the cellular debris. One-step purification of the soluble his<sub>6</sub>-tagged fusion protein by affinity chromatography with Ni-NTA agarose resin (Qiagen) was performed according to the manufacturer's instructions. To change the buffer, the purified protein was passed through a PD-10 column (GE Healthcare), which had been equilibrated with 50 mM Tris-HCl, pH 7.5, previously. *AtaPT* was eluted with the 50 mM Tris-HCl, 15 % glycerol, pH 7.5. The purified enzyme was checked by SDS-PAGE (Figure S1). Bradford Protein Assay was used for protein quantification.

## Enzyme assays

The reaction mixtures (100 $\mu$ L) for determination of enzymatic activities contained 0.5 mM biflavonoid, 10 mM CaCl<sub>2</sub>, 10% DMSO (v/v), 0.8 mM DMAPP or GPP and 100  $\mu$ g purified recombinant protein AtaPT in 50 mM Tris-HCl, pH 7.5. After incubation for 16 h at 37 °C, the reaction was terminated by the addition of 100  $\mu$ l of MeOH and vortexing for 1 min. The protein was removed by centrifugation at 12,000 g, 4 °C for 20 min. The supernatant was directly analyzed by HPLC. For kinetic parameter determination, the enzyme assays (50 $\mu$ L) contained 10 mM CaCl<sub>2</sub>, 10% DMSO (v/v), 2 mM GPP and substrates at final concentrations of 0.02, 0.05, 0.1, 0.2, 0.5 and 1 mM. The used protein amounts and incubation time were 12.5  $\mu$ g/60 min for substrates **1-3** and 25  $\mu$ g/90 min for substrate **4**.

For enzymatic product isolation, assays were carried out under the same condition described above in large scales (30-60 ml). The reactions were incubated at 37 °C for overnight and then extracted by ethyl acetate for 3 times. The residues were dissolved in methanol and injected to a semi-preparative HPLC for purification.

## HPLC conditions for analysis and isolation

The enzymatic products were analyzed by high performance liquid chromatography (HPLC Agilent 1100) with a Venusll MP C18 4.6ID  $\times$ 10cm column. Water (solvent A) and acetonitrile (solvent B) were used at a flow rate of 1 ml/min. The analysis started with a linear gradient of 30-100 % (solvent B, v/v) for 12 minutes. The column was then washed with 100% (v/v) solvent B for 5 minutes, and equilibrated with 30% (v/v) solvent B for 5 minutes.

For compound isolation, semi-preparative HPLC using semi-preparative column (YMC-Pack, ODS-A 250 $\times$ 10 mm) was eluted at a flow rate of 3.0 ml/min. A linear gradient of 35-95 % (v/v) solvent B for 40 min was used to give compounds.

## Protein sequence of his<sub>6</sub>-tagged AtaPT

MLPPSDSKDPRPWQILSQALGFPNYDQELWWQNTAETLNRVLEQCDYSVHL  
QYKYLAFYHKYILPSLGPFRPGVEPEYISGLSHGGHPLEISVKIDKSKTICRL

GLQAIGPLAGTARDPLNSFGDRELLKNLATLLPHVDLRLFDHFNAQVGLDRA  
QCAVATTKLIKESHNIVCTSLDLKDGEVIPKVYFSTIPKGLVTETPLFDLTFAA  
IEQMEVYHKDAPLRTALSALKDFLRPRVPTDASITPPLTGLIGVDCIDPMLSRL  
KVYLATFRMDLSLIRDYWTLGGLLKDEGTMKGLEMVETLAKTLKLGDEAC  
ETLDAERLPFGINYAMKPGTAELAPPQIYFPLLGINDGFIADALVEFFQYMGW  
EDQASRYKDELKAKFPNVDISQTKNVHRWLGVAYSETKGPSMNIYYDVVA  
GNVARVHHHHHH\*

## Supplementary Tables and Figures

Table S1: HR-ESI-MS data of compounds **1a-4a**.

| Compounds | Chemical formula                                | HR-ESI-MS data              |          | Deviation (ppm) |
|-----------|-------------------------------------------------|-----------------------------|----------|-----------------|
|           |                                                 | Calculated                  | Measured |                 |
| <b>1a</b> | C <sub>42</sub> H <sub>38</sub> O <sub>10</sub> | 703.2543 [M+H] <sup>+</sup> | 703.2545 | 0.3             |
| <b>2a</b> | C <sub>41</sub> H <sub>36</sub> O <sub>10</sub> | 689.2387 [M+H] <sup>+</sup> | 689.2382 | -0.7            |
| <b>3a</b> | C <sub>40</sub> H <sub>34</sub> O <sub>10</sub> | 675.2230 [M+H] <sup>+</sup> | 675.2229 | -0.1            |
| <b>4a</b> | C <sub>40</sub> H <sub>34</sub> O <sub>10</sub> | 675.2230 [M+H] <sup>+</sup> | 675.2229 | -0.1            |

Table S2:  $^1\text{H}$  NMR and  $^{13}\text{C}$  NMR data of **1a** in  $\text{DMSO-}d_6$ .

| Pos.                        | $\delta_{\text{H}}$ , multi, $J$ | $\delta_{\text{C}}$ |
|-----------------------------|----------------------------------|---------------------|
| <b>2</b>                    | -                                | 165.0               |
| <b>3</b>                    | 6.75, s                          | 102.7               |
| <b>4</b>                    | -                                | 181.9               |
| <b>5</b>                    | -                                | 161.1               |
| <b>6</b>                    | 6.28, s                          | 98.0                |
| <b>7</b>                    | -                                | 164.5               |
| <b>8</b>                    | 6.36, s                          | 92.5                |
| <b>9</b>                    | -                                | 157.3               |
| <b>10</b>                   | -                                | 104.6               |
| <b>11 (OCH<sub>3</sub>)</b> | 3.74, s                          | 56.0                |
| <b>1'</b>                   | -                                | 117.2               |
| <b>2'</b>                   | 8.23, bd                         | 131.5               |
| <b>3'</b>                   | -                                | 123.9               |
| <b>4'</b>                   | -                                | 166.6               |
| <b>5'</b>                   | 6.86, d, 8.6                     | 119.9               |
| <b>6'</b>                   | 7.87, dd, 2.0, 8.6               | 126.5               |
| <b>2''</b>                  | -                                | 159.0               |
| <b>3''</b>                  | 6.52, s                          | 106.2               |
| <b>4''</b>                  | -                                | 176.0               |
| <b>5''</b>                  | -                                | 158.5               |
| <b>6''</b>                  | 6.25, s                          | 101.4               |
| <b>7''</b>                  | -                                | 169.5               |
| <b>8''</b>                  | -                                | 108.5               |
| <b>9''</b>                  | -                                | 156.4               |
| <b>10''</b>                 | -                                | 106.3               |
| <b>1'''</b>                 | -                                | 123.4               |
| <b>2'''</b>                 | 7.69, d, 8.7                     | 127.3               |

|                              |              |       |
|------------------------------|--------------|-------|
| <b>3'''</b>                  | 6.65, d, 8.7 | 114.2 |
| <b>4'''</b>                  | -            | 161.4 |
| <b>5'''</b>                  | 6.65, d, 8.7 | 114.2 |
| <b>6'''</b>                  | 7.69, d, 8.7 | 127.3 |
| <b>7'''(OCH<sub>3</sub>)</b> | 3.54, s      | 55.3  |
| <b>1''''</b>                 | 4.59, d, 5.7 | 65.5  |
| <b>2''''</b>                 | 5.46, t, 5.7 | 120.7 |
| <b>3''''</b>                 | -            | 139.6 |
| <b>4''''</b>                 | 1.74, s      | 16.5  |
| <b>5''''</b>                 | 2.07, m      | 39.0  |
| <b>6''''</b>                 | 2.10, m      | 25.9  |
| <b>7''''</b>                 | 5.12, t, 6.5 | 123.8 |
| <b>8''''</b>                 | -            | 131.1 |
| <b>9''''</b>                 | 1.65, s      | 25.5  |
| <b>10''''</b>                | 1.59, s      | 17.6  |



Table S3:  $^1\text{H}$  NMR and  $^{13}\text{C}$  NMR data of **2a** in  $\text{DMSO-}d_6$ .

| Compd                  | <p style="text-align: center;"><b>2a</b></p> |                     |
|------------------------|----------------------------------------------|---------------------|
| Pos.                   | $\delta_{\text{H}}$ , multi, $J$             | $\delta_{\text{C}}$ |
| 2                      | -                                            | 165.1               |
| 3                      | 6.80, s                                      | 103.0               |
| 4                      | -                                            | 181.9               |
| 5                      | -                                            | 161.1               |
| 6                      | 6.31, overlaps                               | 98.1                |
| 7                      | -                                            | 165.1               |
| 8                      | 6.55, overlaps                               | 92.7                |
| 9                      | -                                            | 157.4               |
| 10                     | -                                            | 104.7               |
| 11 (OCH <sub>3</sub> ) | 3.77, s                                      | 56.1                |
| 1'                     | -                                            | 117.4               |
| 2'                     | 8.19, d, 2.4                                 | 131.4               |
| 3'                     | -                                            | 123.9               |
| 4'                     | -                                            | 164.2               |
| 5'                     | 6.91, d, 8.7                                 | 119.7               |
| 6'                     | 7.92, dd, 2.4, 8.7                           | 127.5               |
| 2''                    | -                                            | 159.7               |
| 3''                    | 6.45, s                                      | 105.4               |
| 4''                    | -                                            | 176.0               |
| 5''                    | -                                            | 158.6               |
| 6''                    | 6.31, s                                      | 97.7                |
| 7''                    | -                                            | 167.1               |
| 8''                    | -                                            | 107.4               |
| 9''                    | -                                            | 156.3               |
| 10''                   | -                                            | 105.6               |
| 1'''                   | -                                            | 121.7               |

|        |              |       |
|--------|--------------|-------|
| 2'''   | 7.55, d, 8.8 | 127.8 |
| 3'''   | 6.54, d, 8.7 | 115.6 |
| 4'''   | -            | 160.2 |
| 5'''   | 6.54, d, 8.7 | 115.6 |
| 6'''   | 7.55, d, 8.8 | 127.8 |
| 1''''  | 4.60, d, 5.9 | 65.6  |
| 2''''  | 5.46, t, 6.2 | 120.5 |
| 3''''  | -            | 139.9 |
| 4''''  | 1.74, s      | 16.6  |
| 5''''  | 2.06, m      | 38.9  |
| 6''''  | 2.11, m      | 25.5  |
| 7''''  | 5.11, t, 6.1 | 123.8 |
| 8''''  | -            | 131.1 |
| 9''''  | 1.65, s      | 25.9  |
| 10'''' | 1.58, s      | 17.6  |

Table S4: <sup>1</sup>H NMR data of **3a** in acetone-*d*<sub>6</sub> and DMSO-*d*<sub>6</sub>.

| Compd | 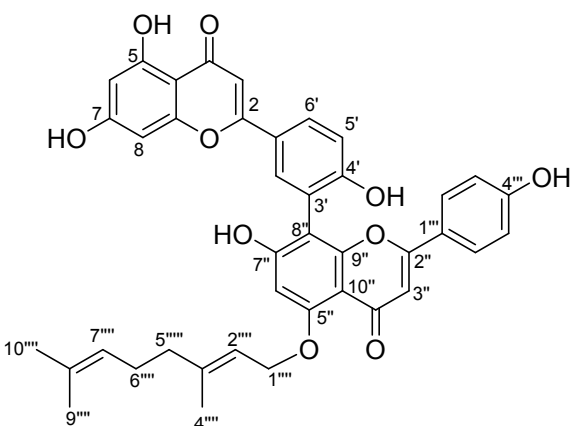<br><b>3a</b> |                                                                            |                                                                         |
|-------|-------------------------------------------------------------------------------------------------|----------------------------------------------------------------------------|-------------------------------------------------------------------------|
|       | Pos.                                                                                            | $\delta_{\text{H}}$ , multi, <i>J</i><br>in Acetone- <i>d</i> <sub>6</sub> | $\delta_{\text{H}}$ , multi, <i>J</i><br>in DMSO- <i>d</i> <sub>6</sub> |
|       | 2                                                                                               | -                                                                          | -                                                                       |
|       | 3                                                                                               | 6.74, s                                                                    | 6.63, s                                                                 |
|       | 4                                                                                               | -                                                                          | -                                                                       |
|       | 5                                                                                               | -                                                                          | -                                                                       |
|       | 6                                                                                               | 6.23, d, 2.0                                                               | 6.05, br.s                                                              |
|       | 7                                                                                               | -                                                                          | -                                                                       |
|       | 8                                                                                               | 6.53, d, 2.0                                                               | 6.14, br.s                                                              |
|       | 9                                                                                               | -                                                                          | -                                                                       |
|       | 10                                                                                              | -                                                                          | -                                                                       |
|       | 5-OH                                                                                            | 13.04                                                                      | -                                                                       |
|       | 1'                                                                                              | -                                                                          | -                                                                       |
|       | 2'                                                                                              | 8.10, d, 2.3                                                               | 8.22, d, 1.4                                                            |
|       | 3'                                                                                              | -                                                                          | -                                                                       |
|       | 4'                                                                                              | -                                                                          | -                                                                       |
|       | 5'                                                                                              | 7.23, d, 8.7                                                               | 6.78, d, 6.8                                                            |
|       | 6'                                                                                              | 8.03, dd, 2.3, 8.6                                                         | 7.80, dd, 1.6, 6.8                                                      |
|       | 2''                                                                                             | -                                                                          | -                                                                       |
|       | 3''                                                                                             | 6.62, s                                                                    | 6.39, s                                                                 |
|       | 4''                                                                                             | -                                                                          | -                                                                       |
|       | 5''                                                                                             | -                                                                          | -                                                                       |
|       | 6''                                                                                             | 6.45, s                                                                    | 6.16, s                                                                 |
|       | 7''                                                                                             | -                                                                          | -                                                                       |
|       | 8''                                                                                             | -                                                                          | -                                                                       |
|       | 9''                                                                                             | -                                                                          | -                                                                       |
|       | 10''                                                                                            | -                                                                          | -                                                                       |

|               |              |              |
|---------------|--------------|--------------|
| <b>1'''</b>   | -            | -            |
| <b>2'''</b>   | 7.54, d, 8.8 | 7.61, d, 7.2 |
| <b>3'''</b>   | 6.78, d, 8.8 | 6.48, d, 7.2 |
| <b>4'''</b>   | -            | -            |
| <b>5'''</b>   | 6.78, d, 8.8 | 6.48, d, 7.2 |
| <b>6'''</b>   | 7.54, d, 8.8 | 7.61, d, 7.2 |
| <b>1''''</b>  | 4.70, d, 6.0 | 4.57, d, 6.7 |
| <b>2''''</b>  | 5.56, t, 5.9 | 5.46, t, 6.8 |
| <b>3''''</b>  | -            | -            |
| <b>4''''</b>  | 1.77, s      | 1.73, s      |
| <b>5''''</b>  | 2.08, m      | 2.06, m      |
| <b>6''''</b>  | 2.14, m      | 2.11, m      |
| <b>7''''</b>  | 5.13, t, 6.8 | 5.12, t, 6.1 |
| <b>8''''</b>  | -            | -            |
| <b>9''''</b>  | 1.66, s      | 1.65, s      |
| <b>10''''</b> | 1.60, s      | 1.59, s      |

Table S5. <sup>1</sup>H NMR and <sup>13</sup>C NMR data of **4a** in DMSO-*d*<sub>6</sub>.

| Compd |                                       |                     |
|-------|---------------------------------------|---------------------|
| Pos.  | $\delta_{\text{H}}$ , multi, <i>J</i> | $\delta_{\text{C}}$ |
| 2     | -                                     | 163.2               |
| 3     | 6.86, s                               | 103.9               |
| 4     | -                                     | 181.9               |
| 5     | -                                     | 161.5               |
| 6     | 6.20, d, 2.0                          | 99.0                |
| 7     | -                                     | 164.5               |
| 8     | 6.49, d, 2.0                          | 94.1                |
| 9     | -                                     | 157.4               |
| 10    | -                                     | 104.0               |
| 5-OH  | 12.89, s                              | -                   |
| 7-OH  | 10.93, s                              | -                   |
| 1'    | -                                     | 124.3               |
| 2'    | 8.02, d, 8.9                          | 128.4               |
| 3'    | 7.03, d, 9.0                          | 115.4               |
| 4'    | -                                     | 160.7               |
| 5'    | 7.03, d, 9.0                          | 115.4               |
| 6'    | 8.02, d, 8.9                          | 128.4               |
| 2''   | -                                     | 164.3               |
| 3''   | 6.81, s                               | 102.5               |
| 4''   | -                                     | 182.1               |
| 5''   | -                                     | 153.2               |
| 6''   | -                                     | 124.7               |
| 7''   | -                                     | 153.8               |
| 8''   | 6.71, s                               | 94.6                |
| 9''   | -                                     | 157.2               |
| 10''  | -                                     | 104.2               |

|               |                |       |
|---------------|----------------|-------|
| <b>5''-OH</b> | 13.21, s       | -     |
| <b>1'''</b>   | -              | 121.0 |
| <b>2'''</b>   | 7.79, overlap  | 128.0 |
| <b>3'''</b>   | -              | 128.7 |
| <b>4'''</b>   | -              | 159.2 |
| <b>5'''</b>   | 6.96, d, 8.2   | 115.5 |
| <b>6'''</b>   | 7.81, overlaps | 126.1 |
| <b>4''-OH</b> | 10.41, s       | -     |
| <b>1''''</b>  | 3.31, d, 7.4   | 28.0  |
| <b>2''''</b>  | 5.34, t, 6.8   | 122.2 |
| <b>3''''</b>  | -              | 135.6 |
| <b>4''''</b>  | 1.72, s        | 16.0  |
| <b>5''''</b>  | 2.01, m        | 39.3  |
| <b>6''''</b>  | 2.07, m        | 26.3  |
| <b>7''''</b>  | 5.08, t, 5.6   | 124.1 |
| <b>8''''</b>  | -              | 130.9 |
| <b>9''''</b>  | 1.58, s        | 25.5  |
| <b>10''''</b> | 1.54, s        | 17.6  |

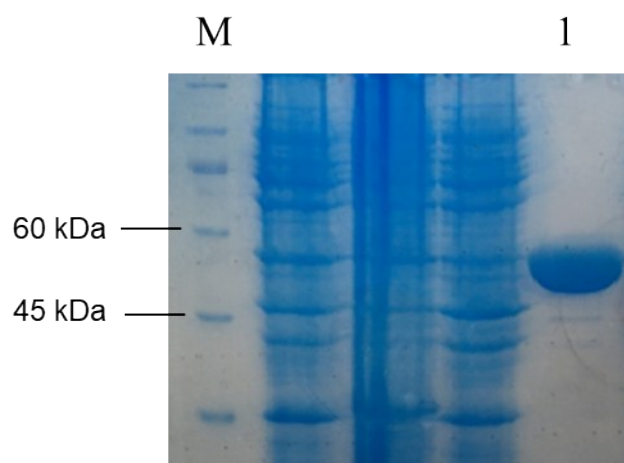

Figure S1: Analysis of purified his<sub>6</sub>-AtaPT on SDS-PAGE.  
Lane M: molecular mass standard; lane 1: purified his<sub>6</sub>-AtaPT.

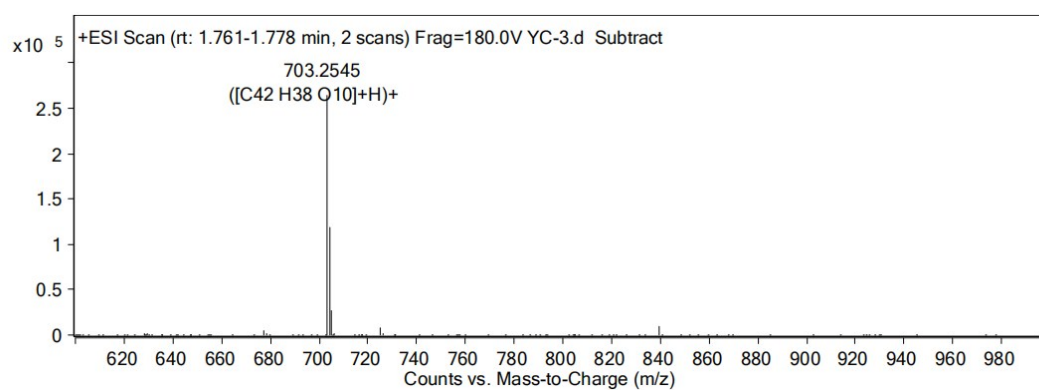

Figure S2: HR-ESI-MS spectrum of compound **1a**.

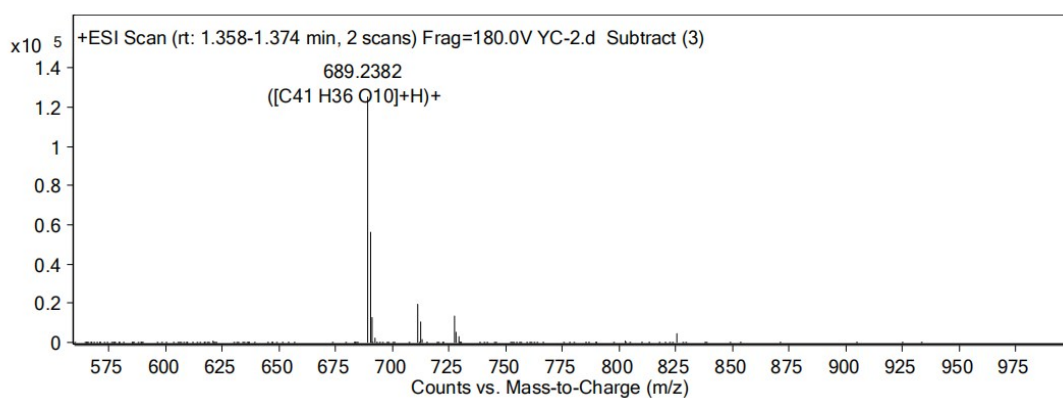

Figure S3: HR-ESI-MS spectrum of compound **2a**.

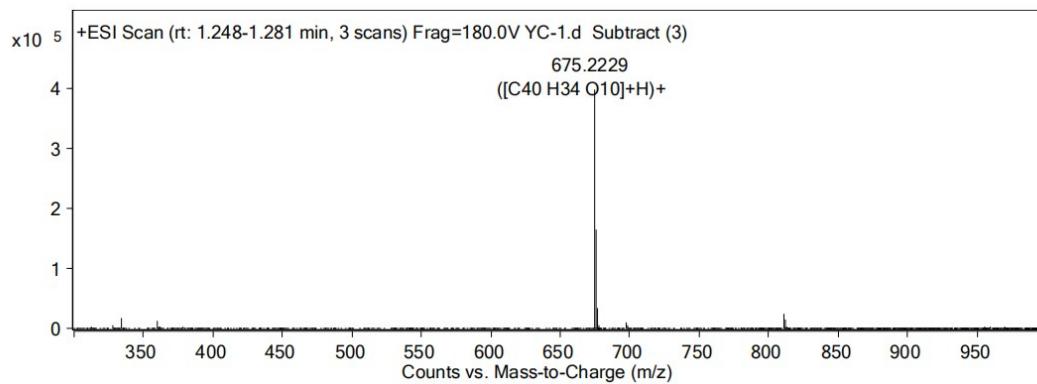

Figure S4: HR-ESI-MS spectrum of compound **3a**.

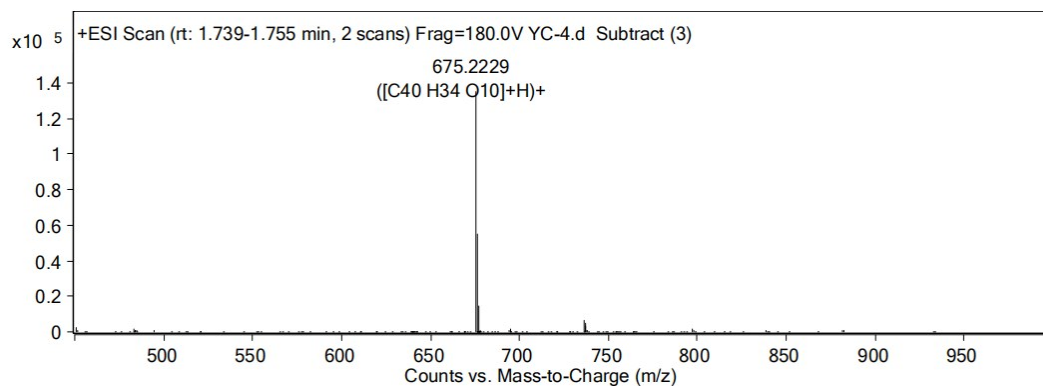

Figure S5: HR-ESI-MS spectrum of compound **4a**.

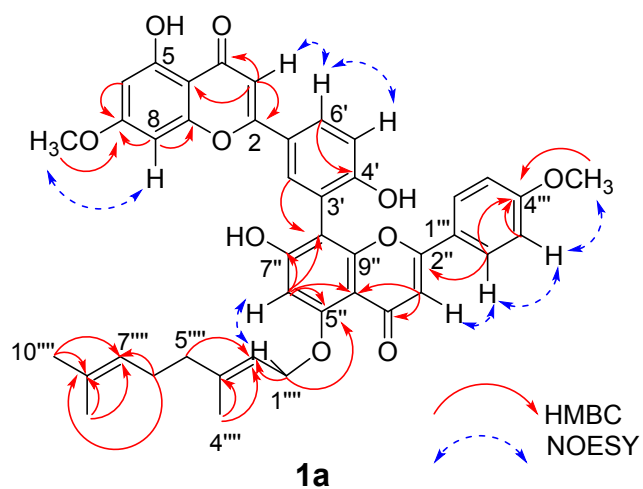

Figure S6: Key HMBC and NOESY correlations of AtaPT product **1a**.



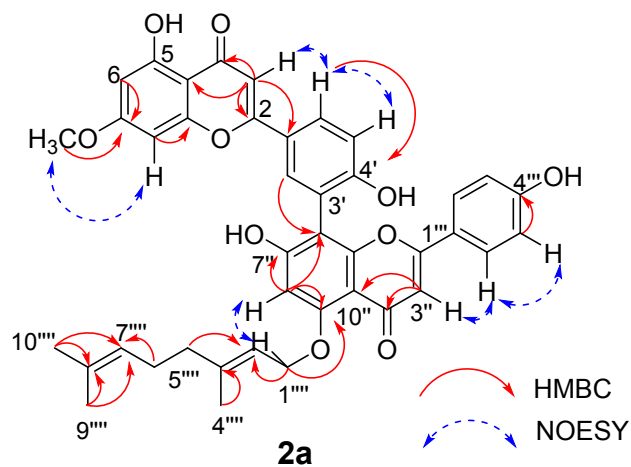

Figure S7: Key HMBC and NOESY correlations of AtaPT product **2a**.

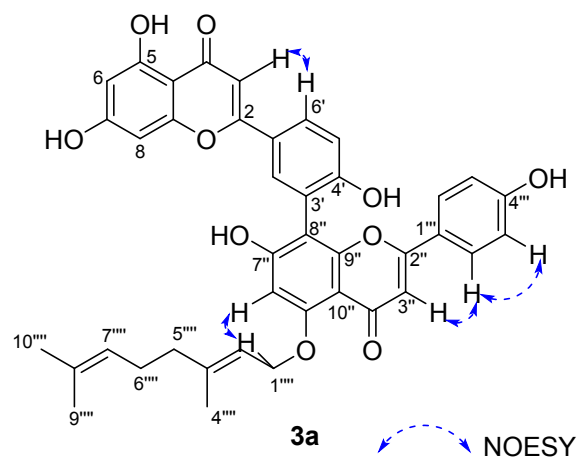

Figure S8: Key NOESY correlations of AtaPT product **3a**.

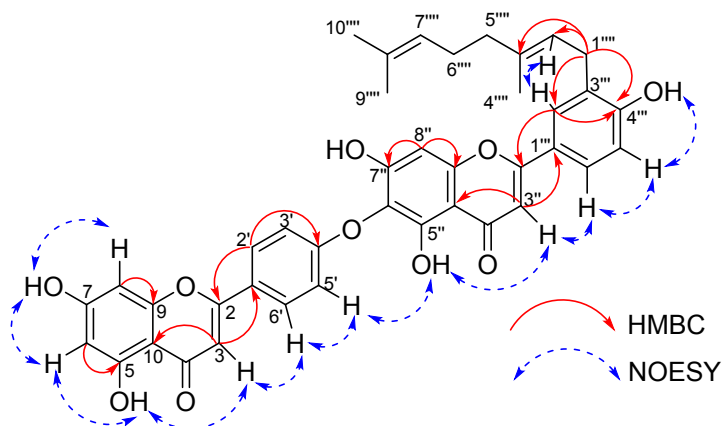

Figure S9: Key HMBC and NOESY correlations of AtaPT product **4a**.

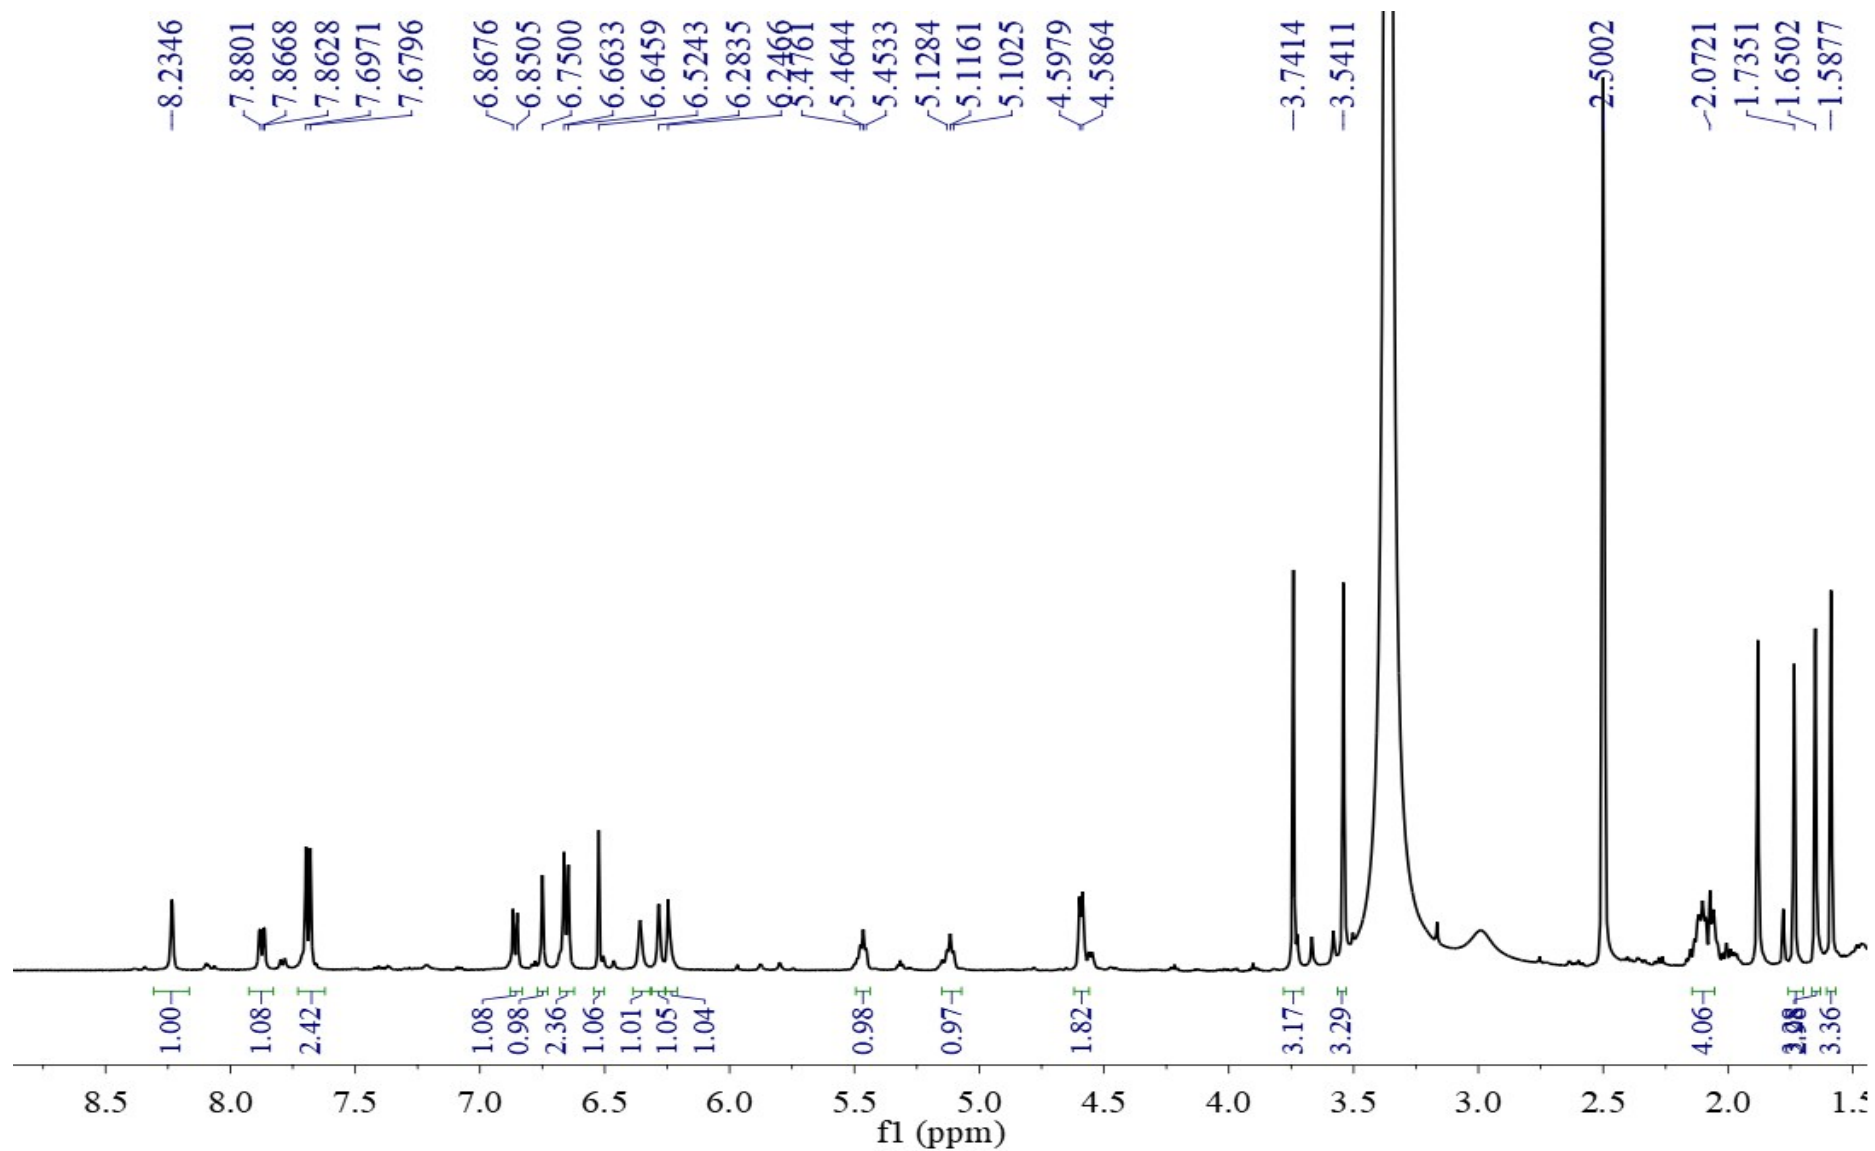

Figure S10:  $^1\text{H}$  NMR spectrum of **1a** in  $\text{DMSO-}d_6$  (500 MHz).

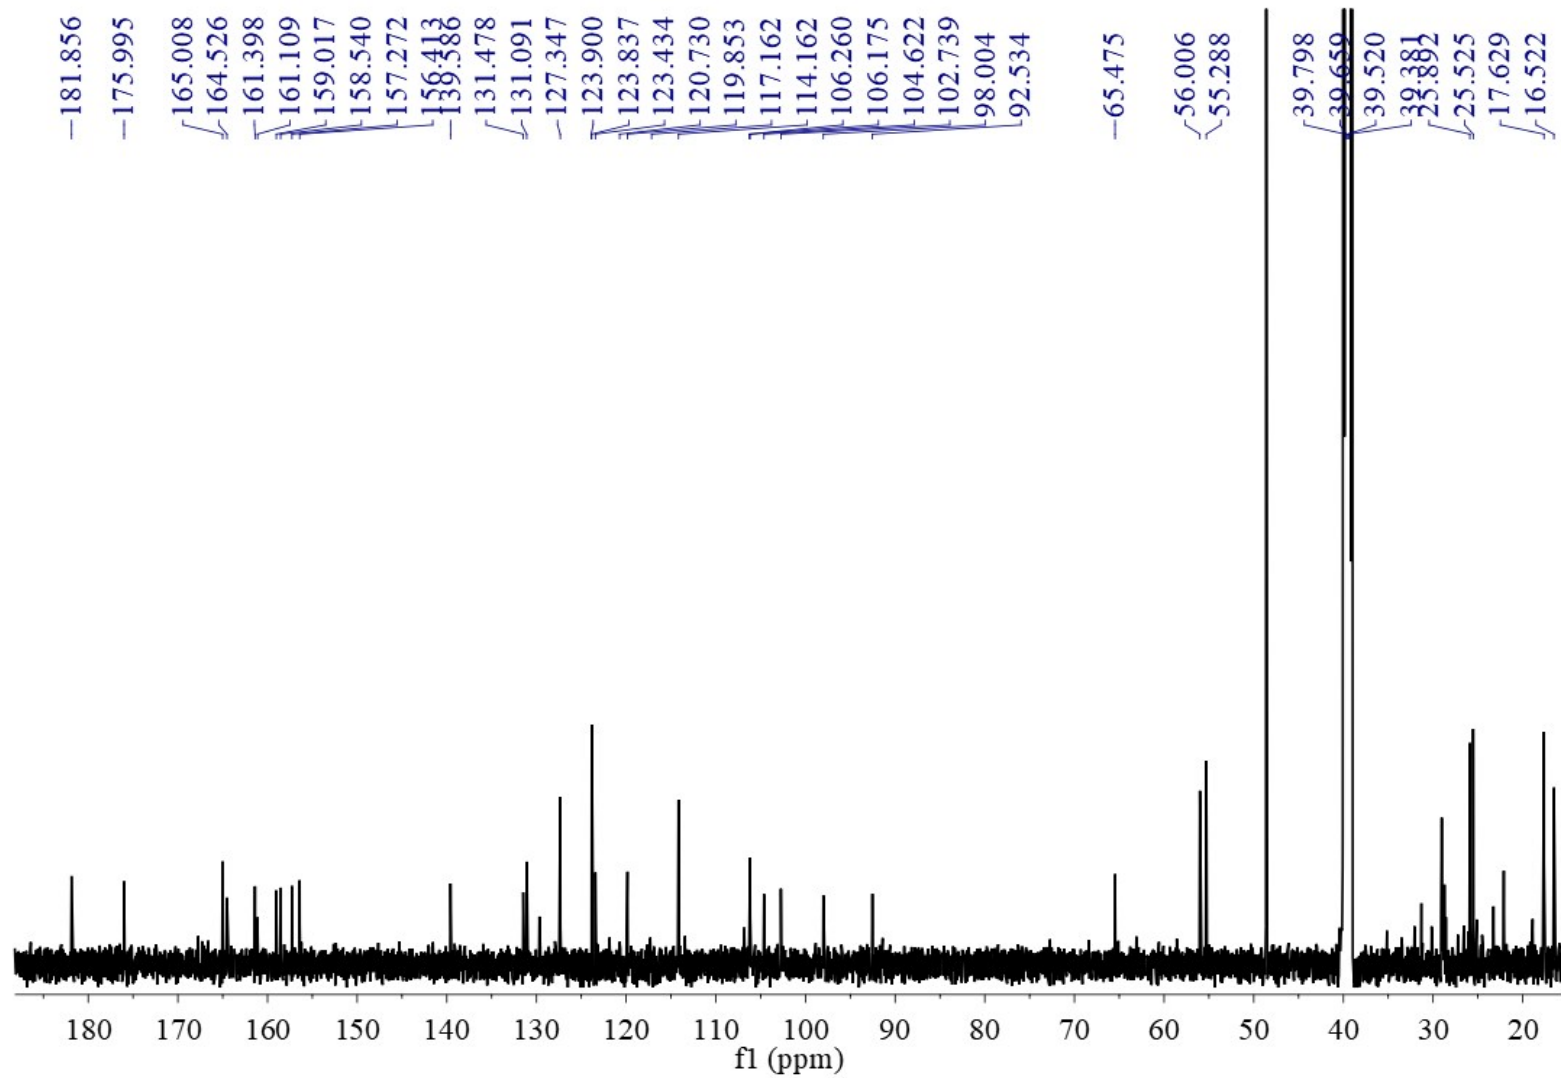

Figure S11:  $^{13}\text{C}$  NMR spectrum of **1a** in  $\text{DMSO-}d_6$  (600 MHz).

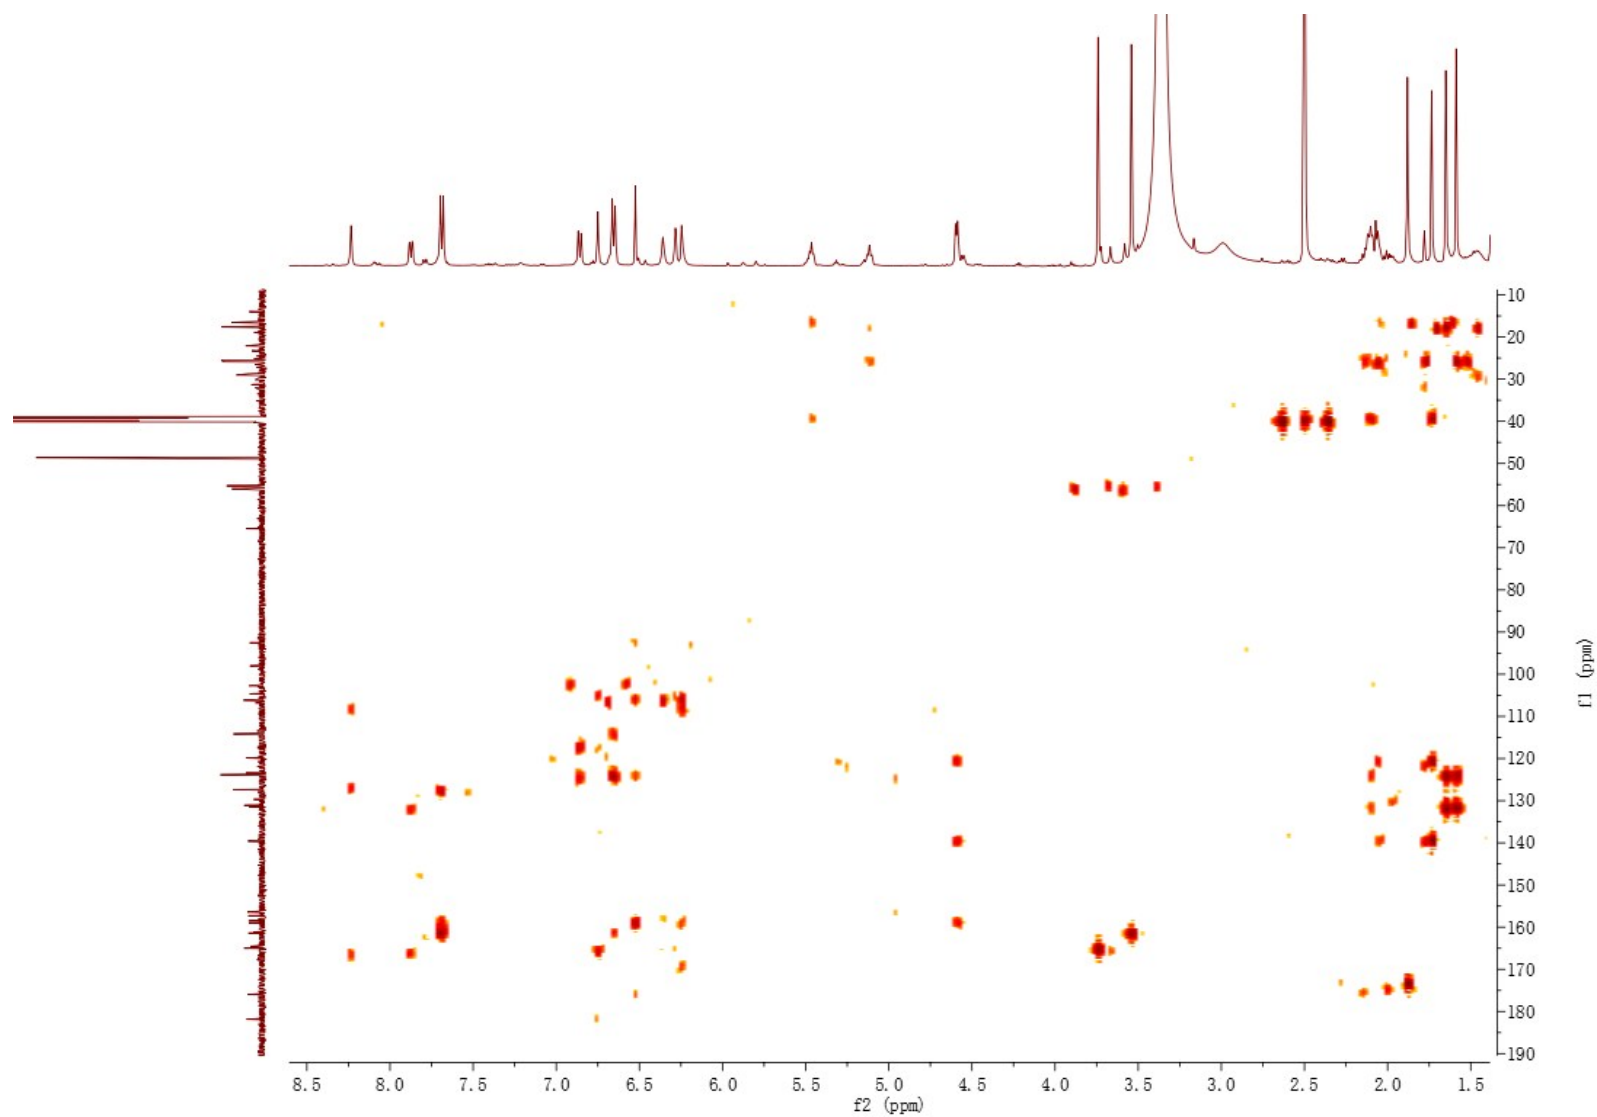

Figure S12: HMBC spectrum of **1a** in DMSO- $d_6$  (500 MHz).

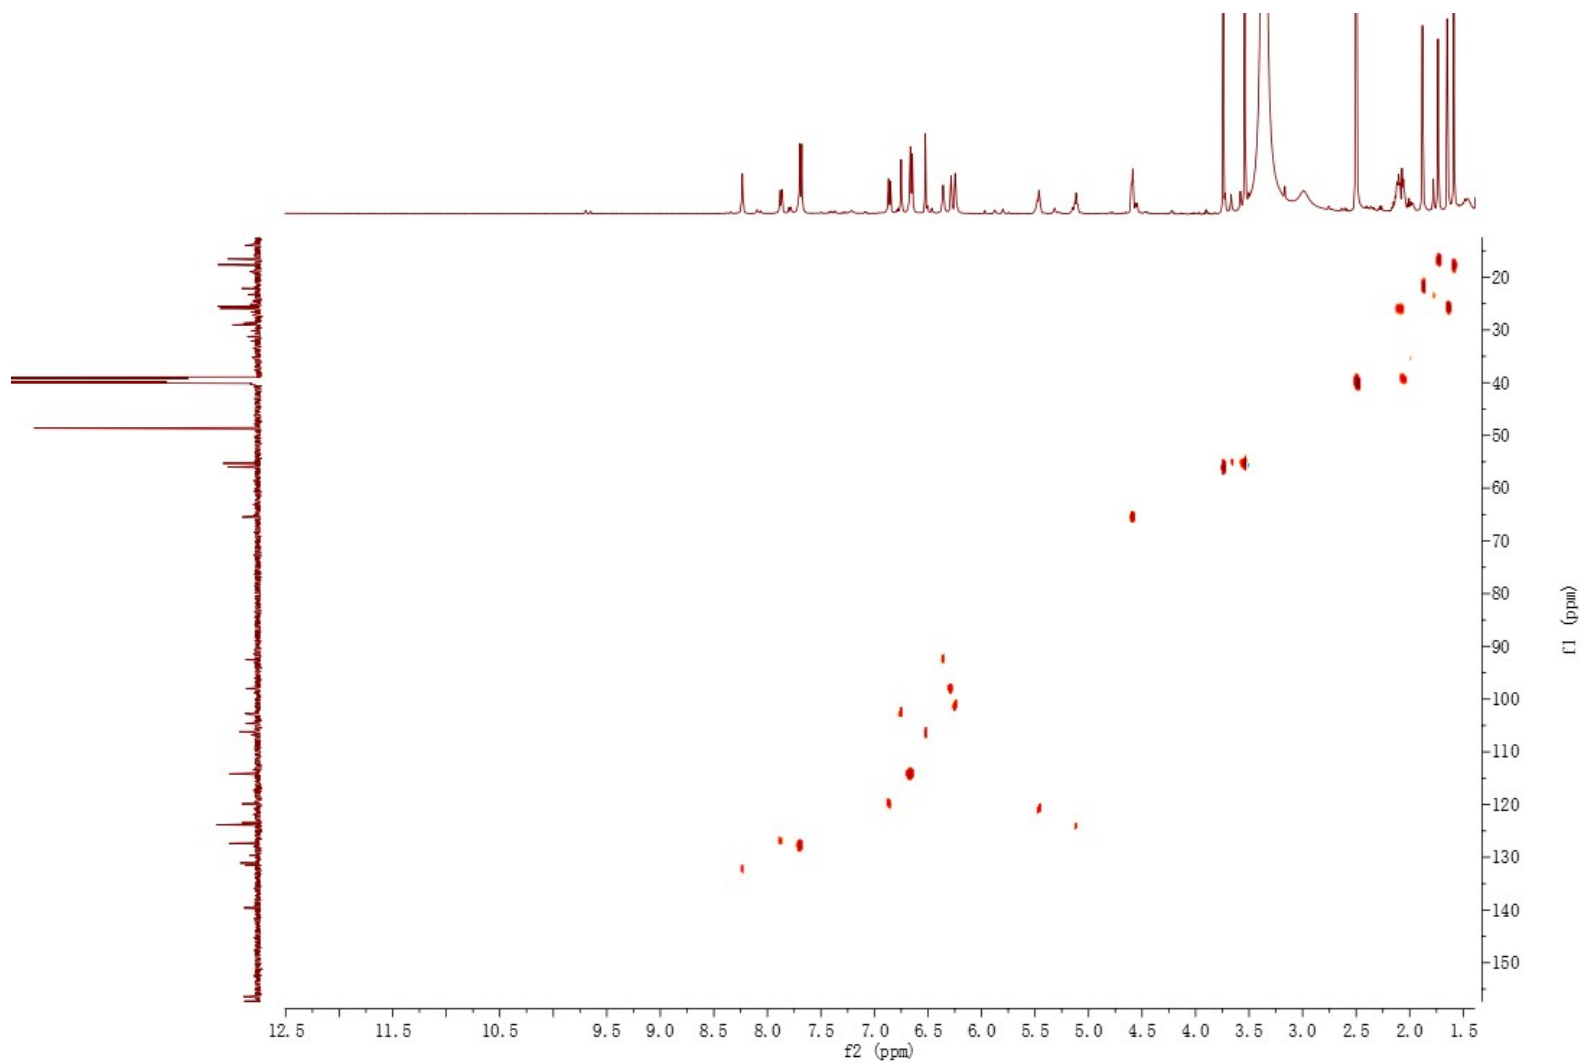

Figure S13: HSQC spectrum of **1a** in  $\text{DMSO-}d_6$  ((400 MHz).

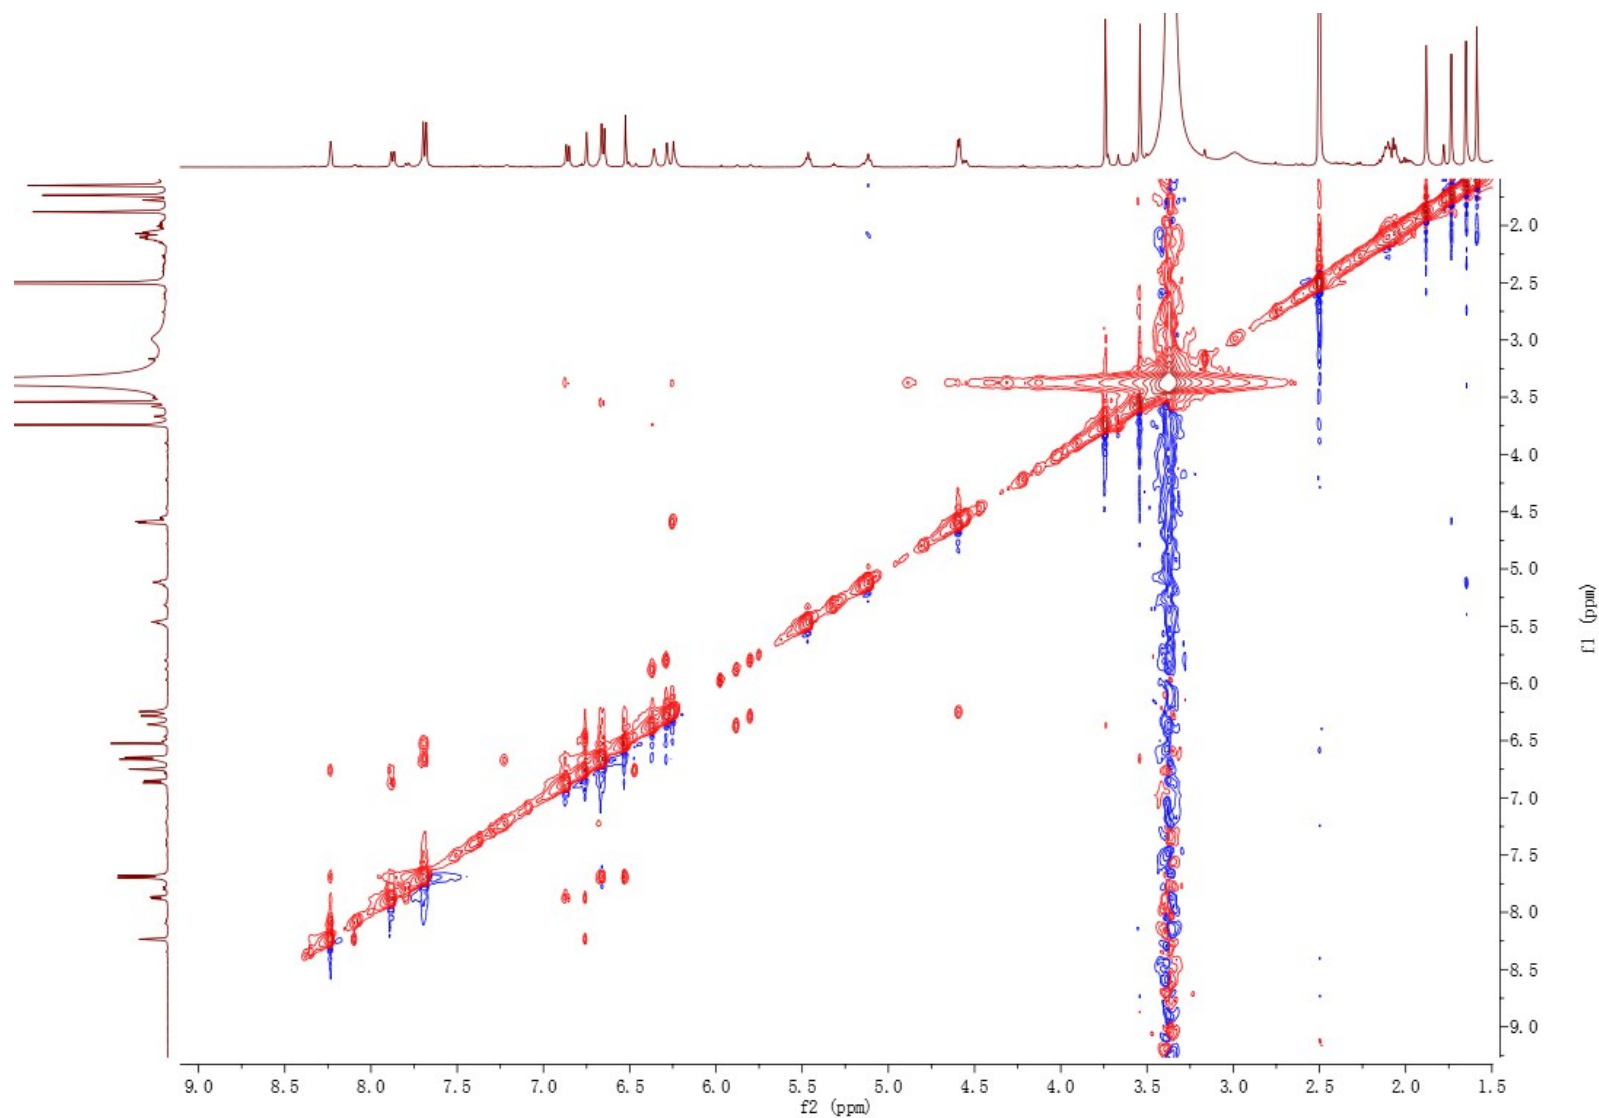

Figure S14: NOESY spectrum of **1a** in DMSO-*d*<sub>6</sub> (500 MHz).

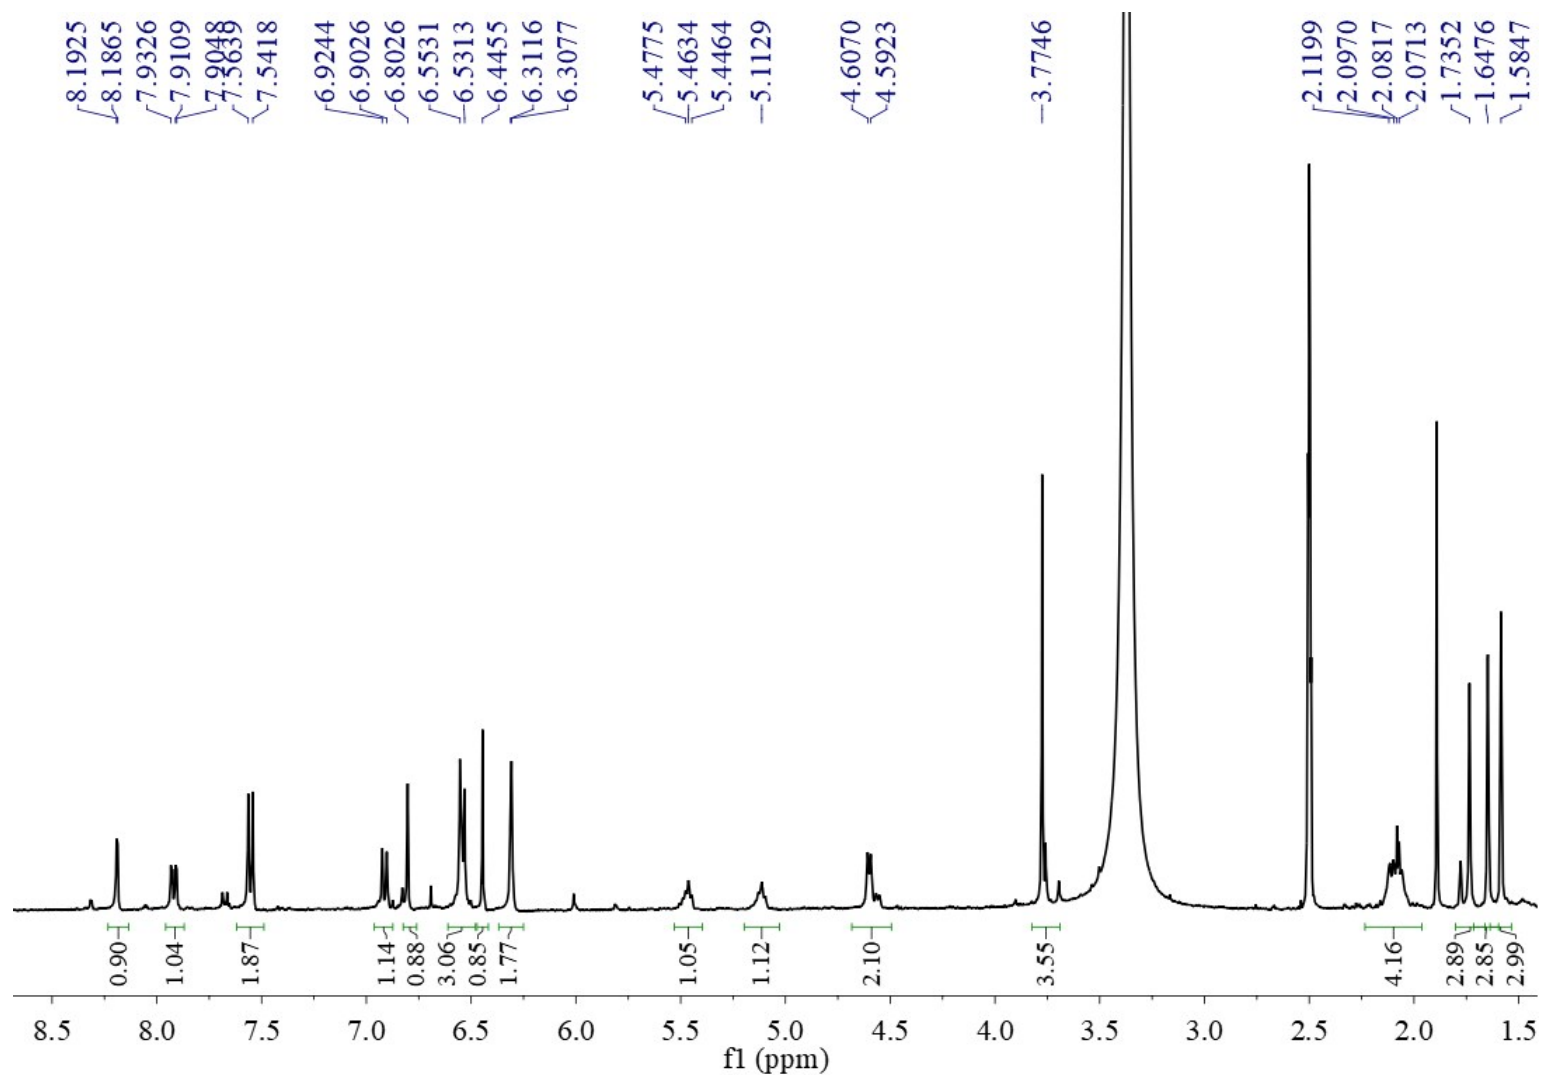

Figure S15:  $^1\text{H}$  NMR spectrum of **2a** in  $\text{DMSO-}d_6$  (400 MHz).

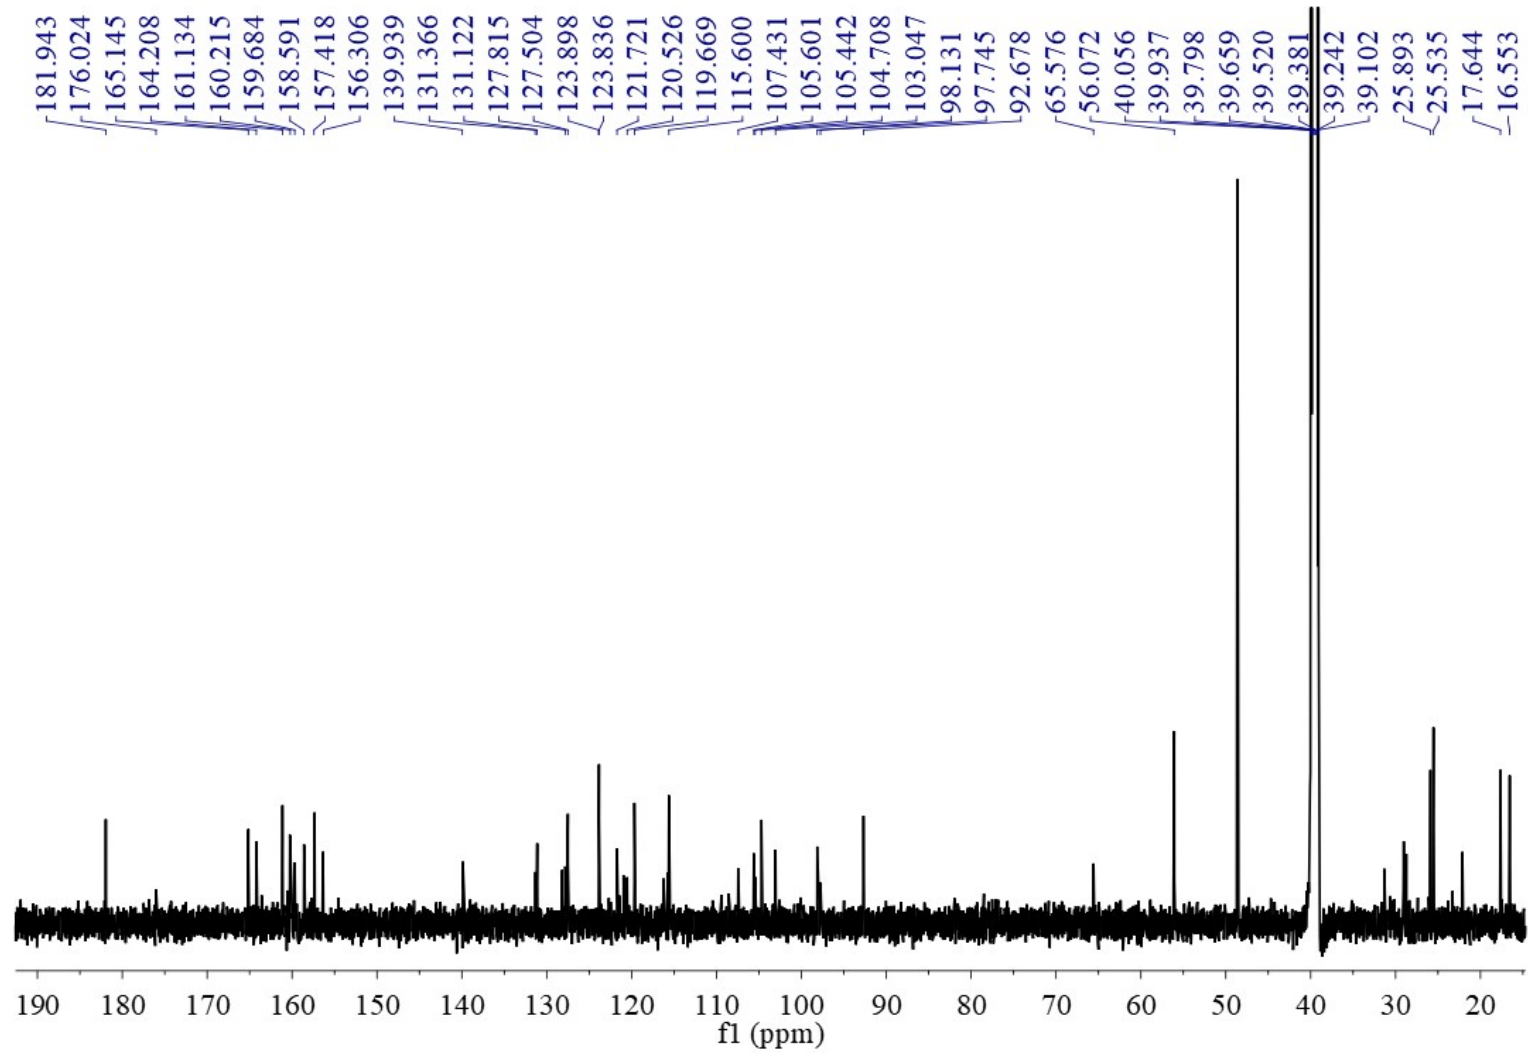

Figure S16:  $^{13}\text{C}$  NMR spectrum of **2a** in  $\text{DMSO-}d_6$  (600 MHz).



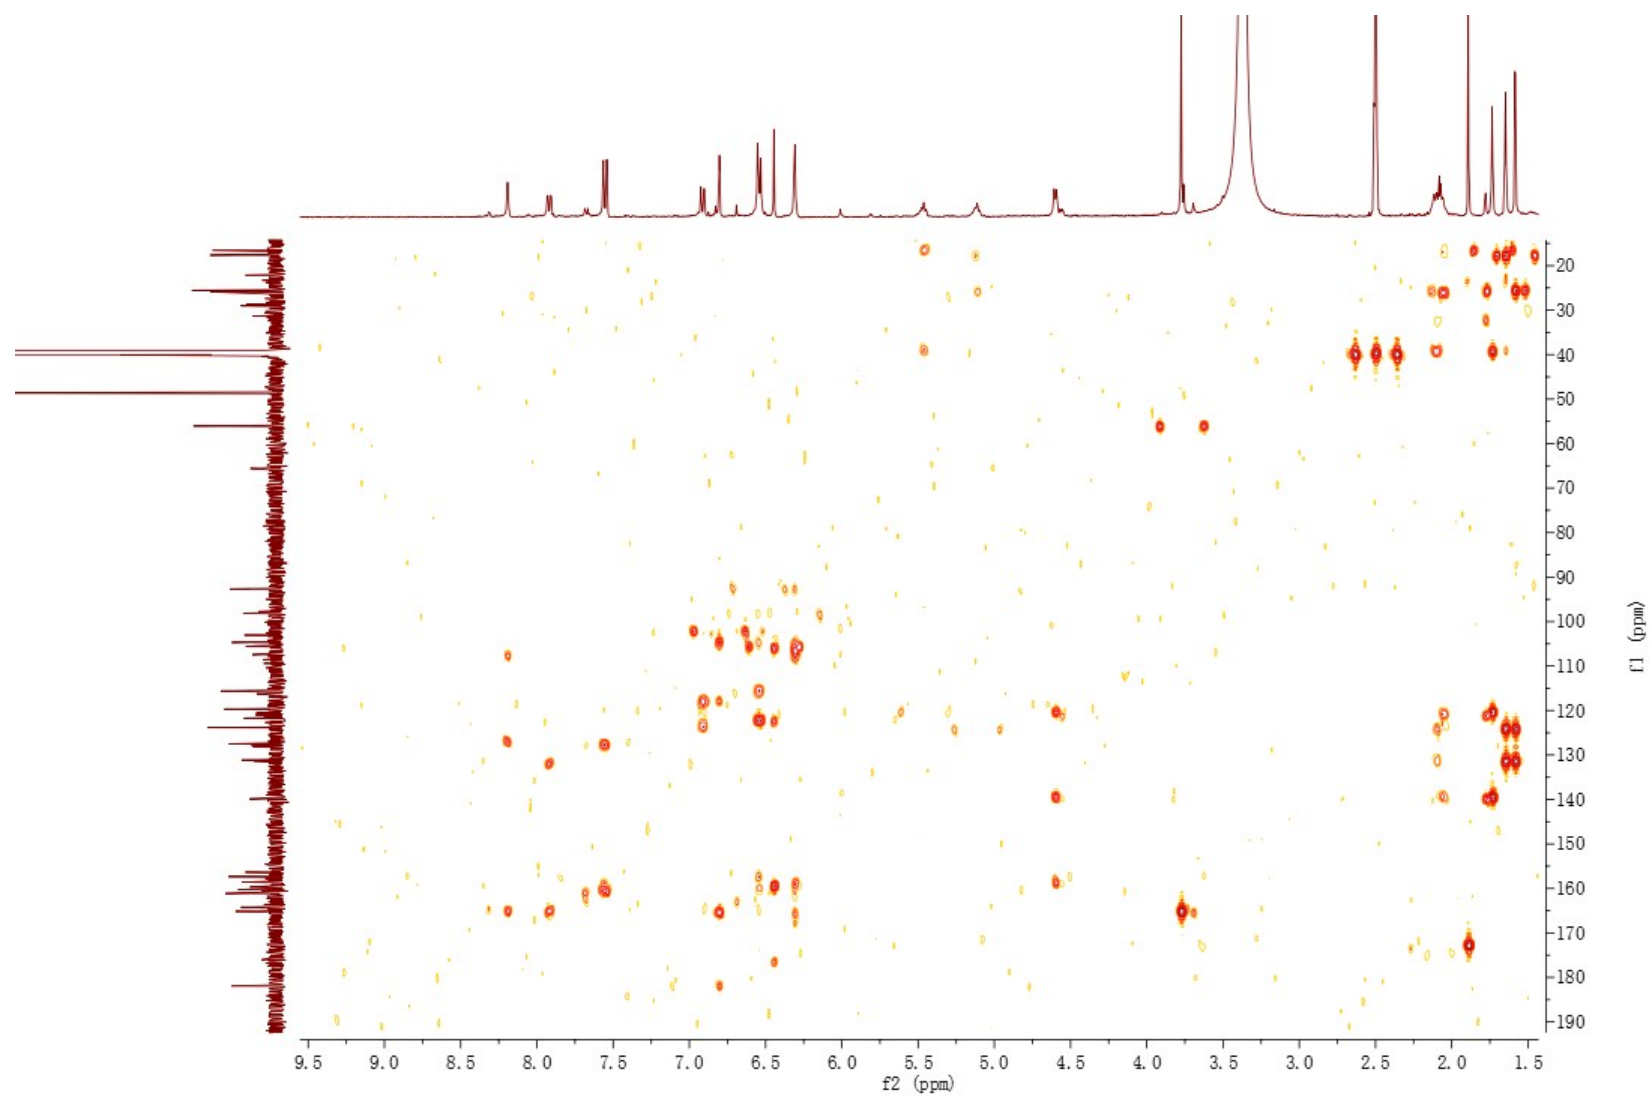

Figure S17: HMBC spectrum of **2a** in DMSO-*d*<sub>6</sub> (500 MHz).

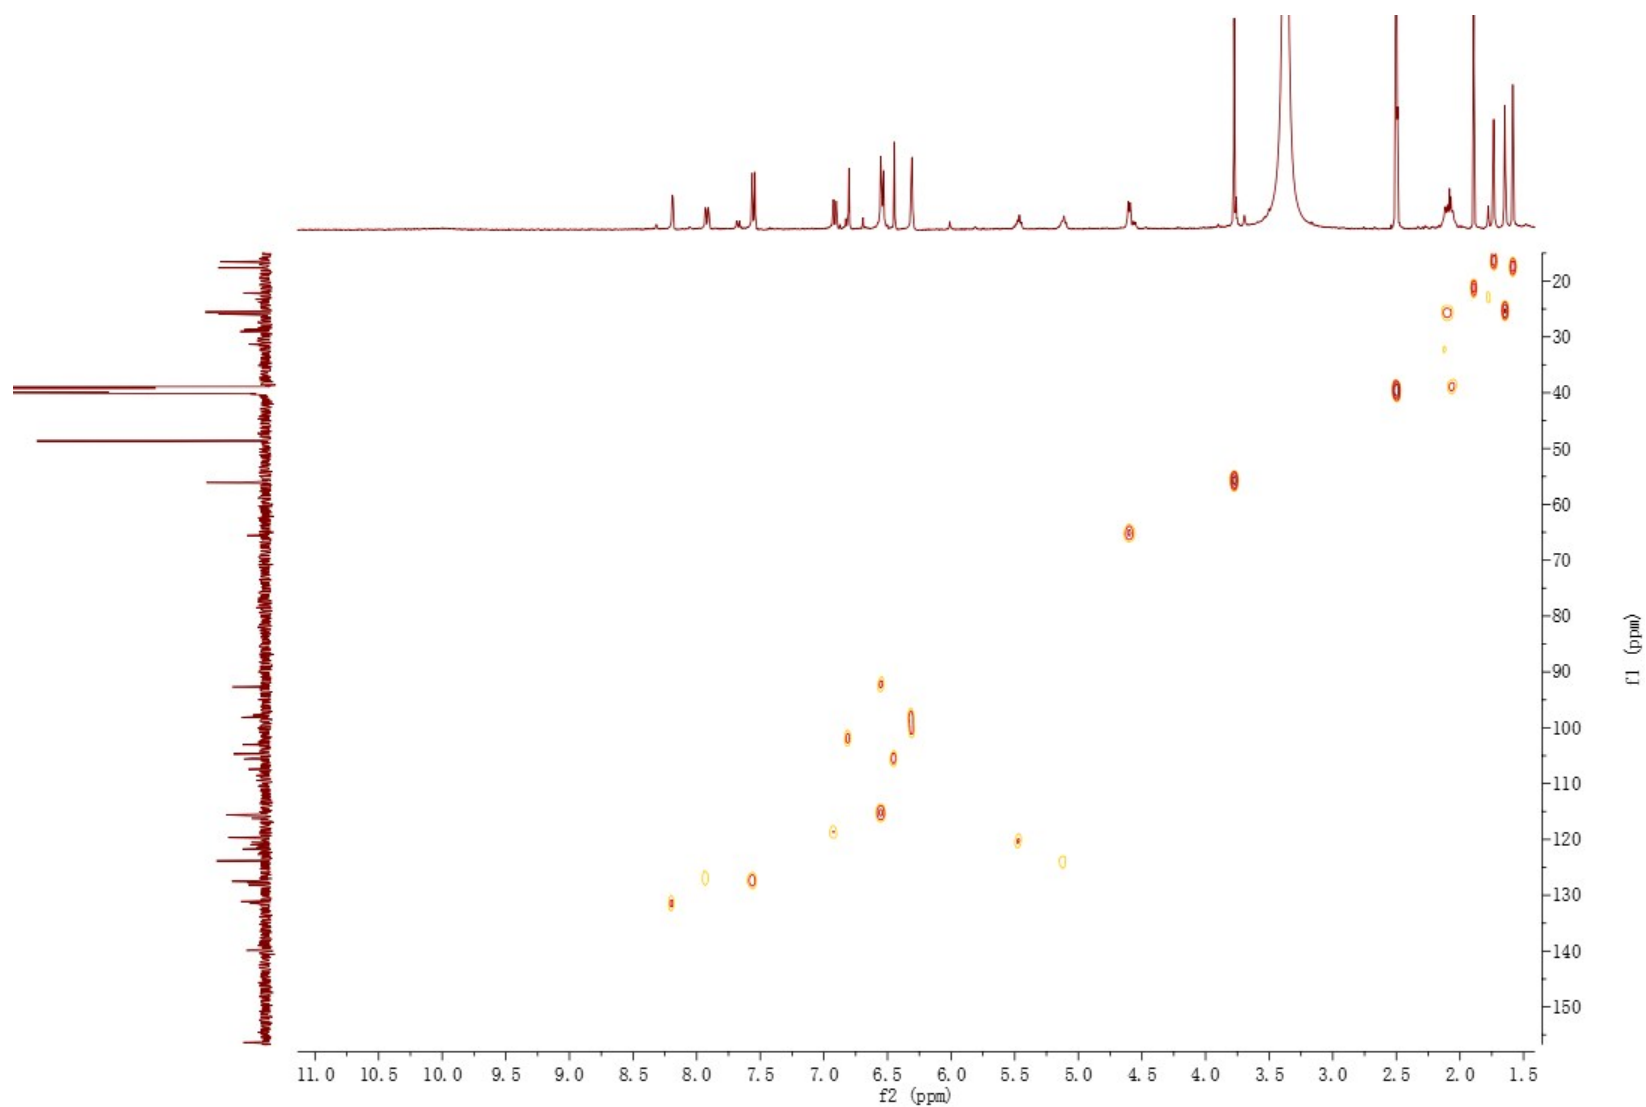

Figure S18: HSQC spectrum of **2a** in DMSO-*d*<sub>6</sub> (400 MHz).

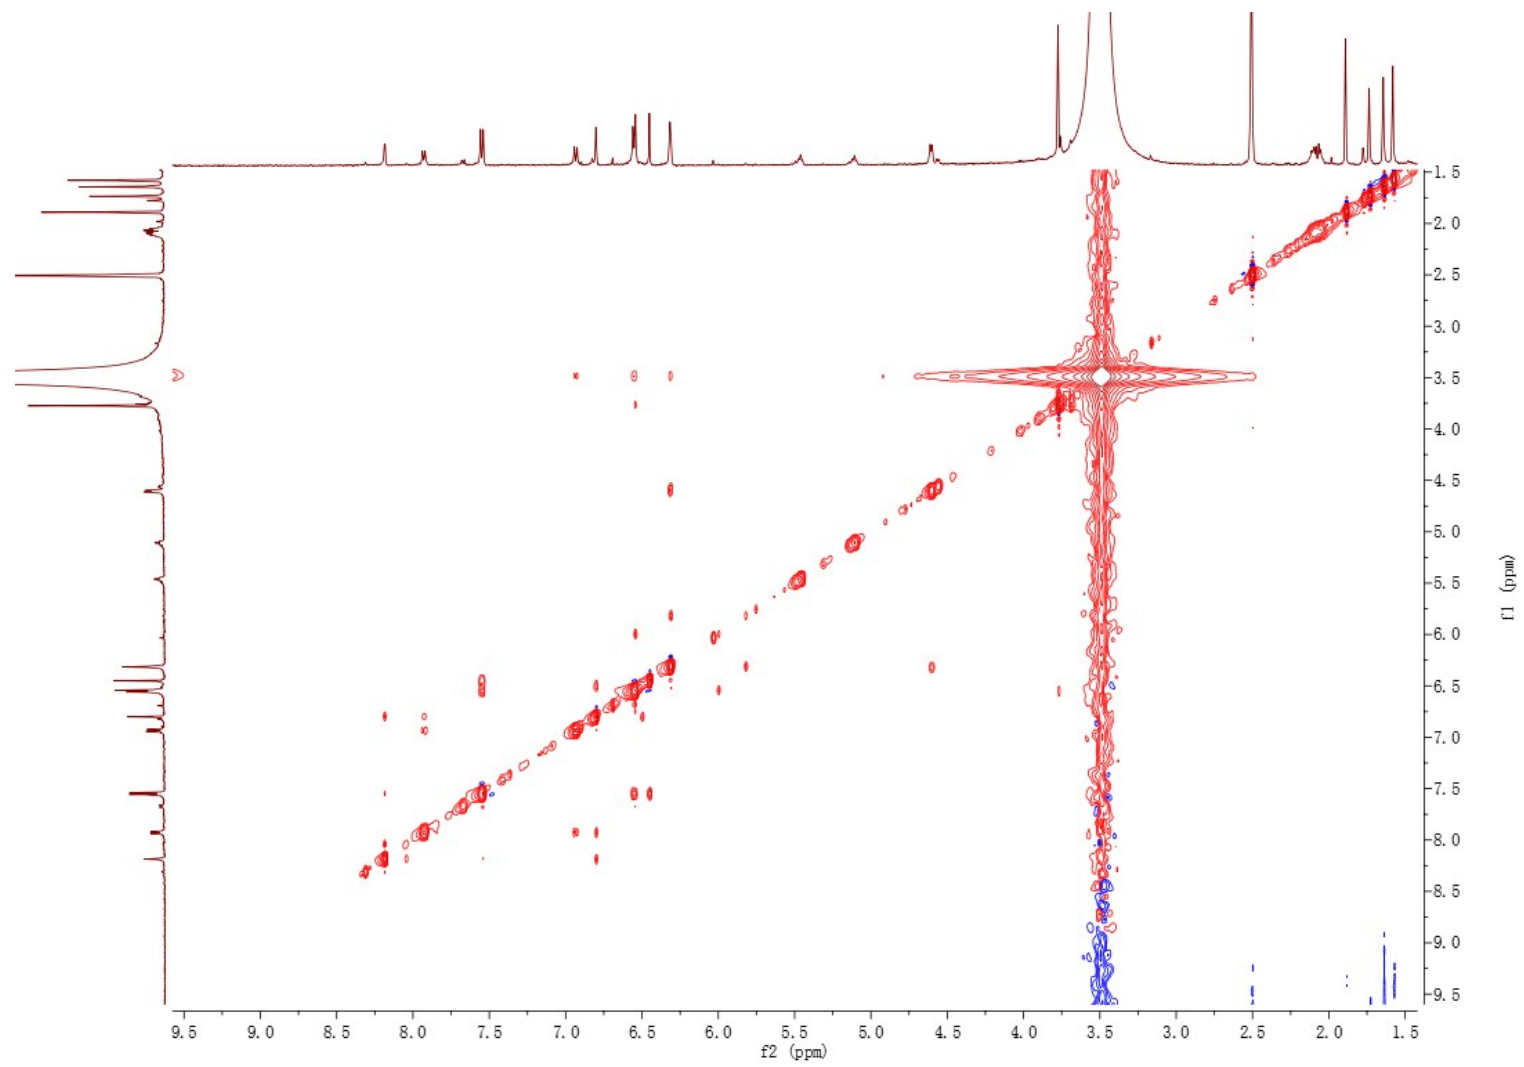

Figure S19: NOESY spectrum of **2a** in DMSO-*d*<sub>6</sub> (500 MHz).

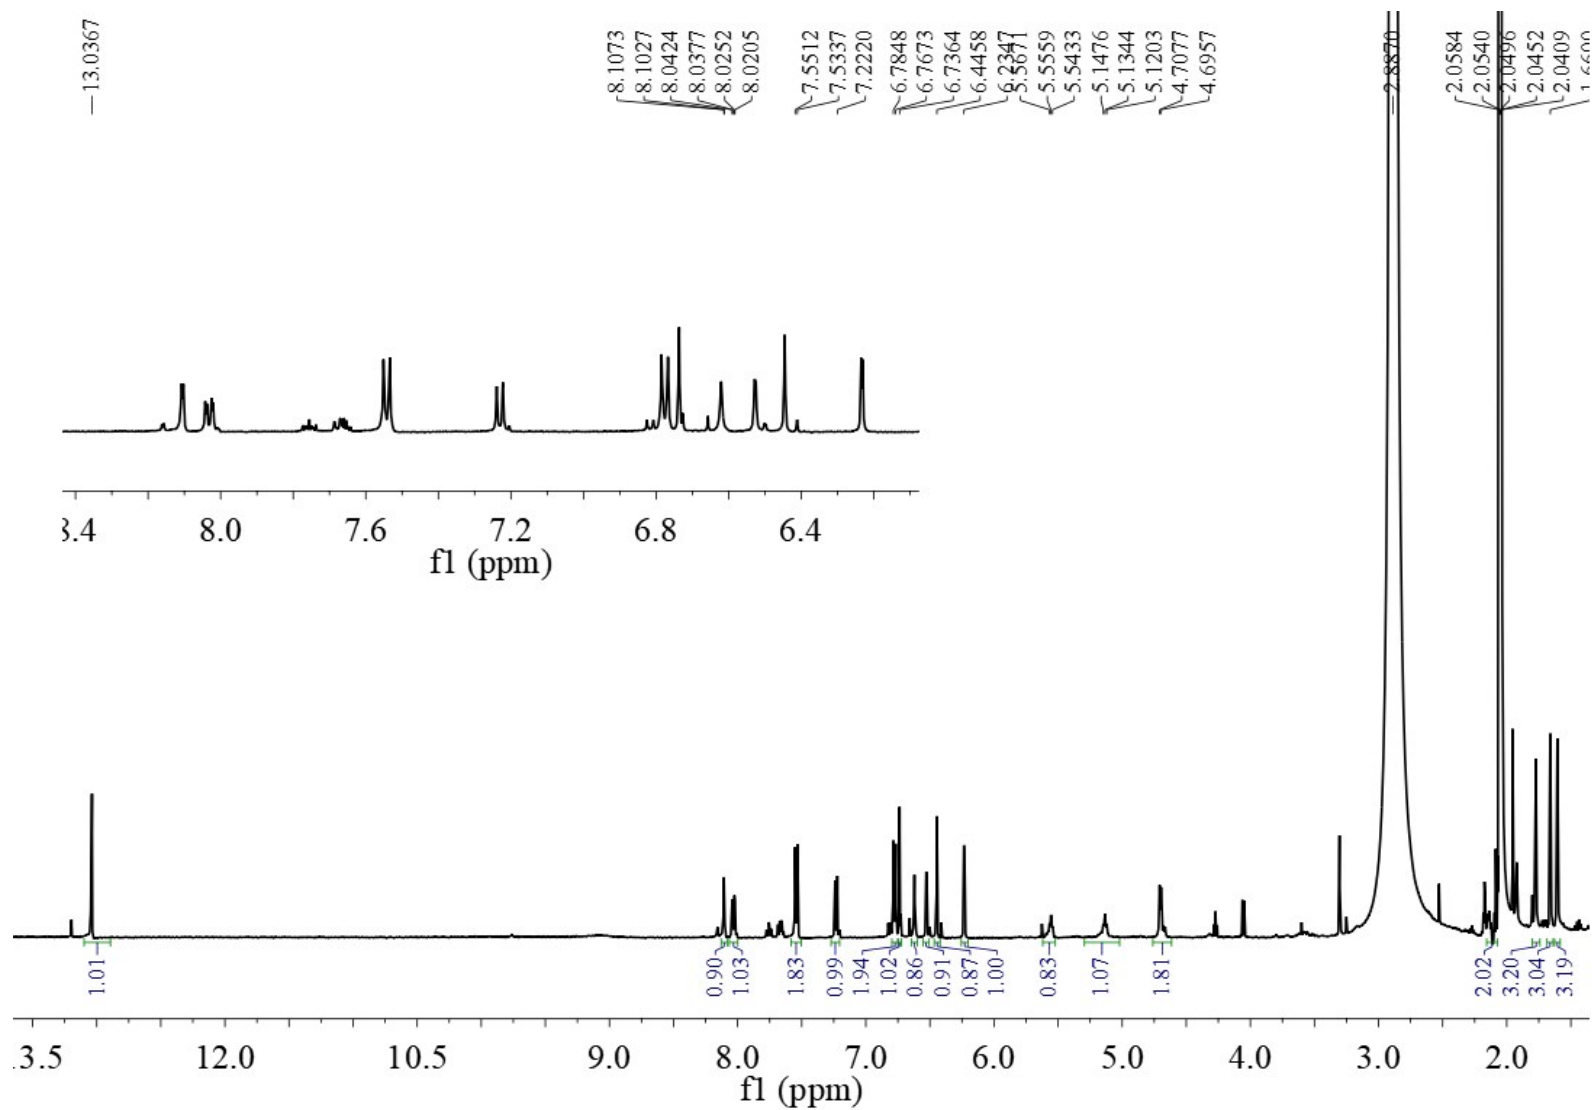

Figure S20:  $^1\text{H}$  NMR spectrum of **3a** in acetone- $d_6$  (500 MHz).

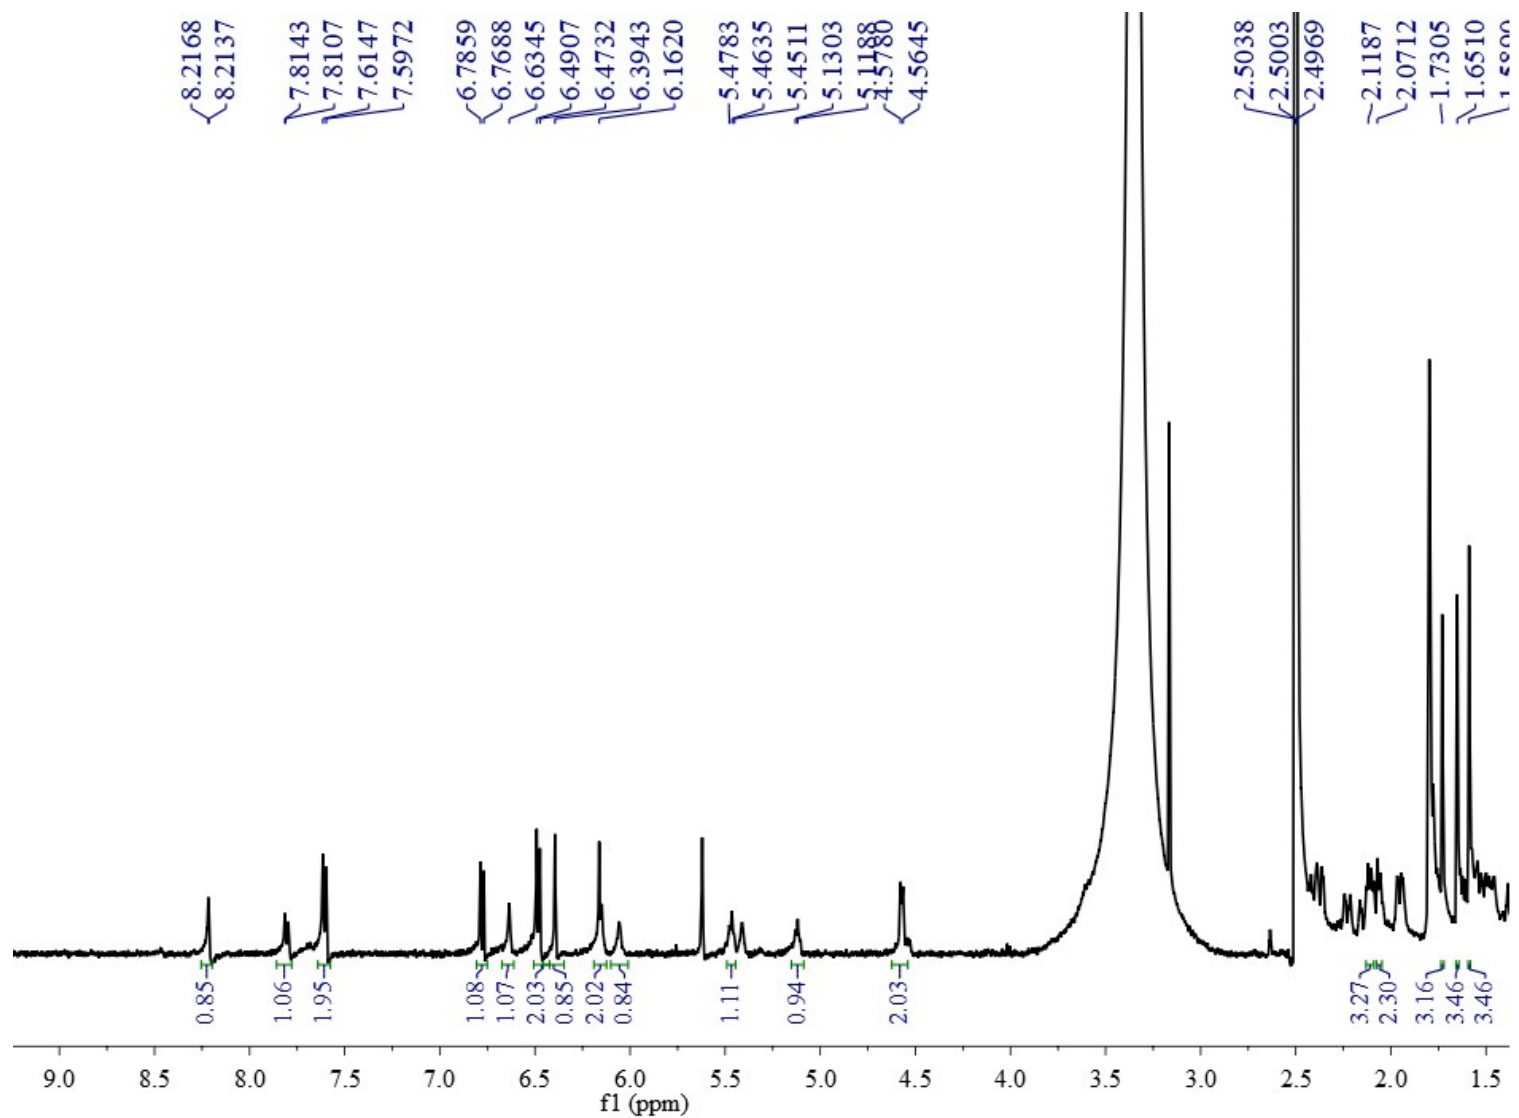

Figure S21: <sup>1</sup>H NMR spectrum of **3a** in DMSO-*d*<sub>6</sub> (500 MHz).

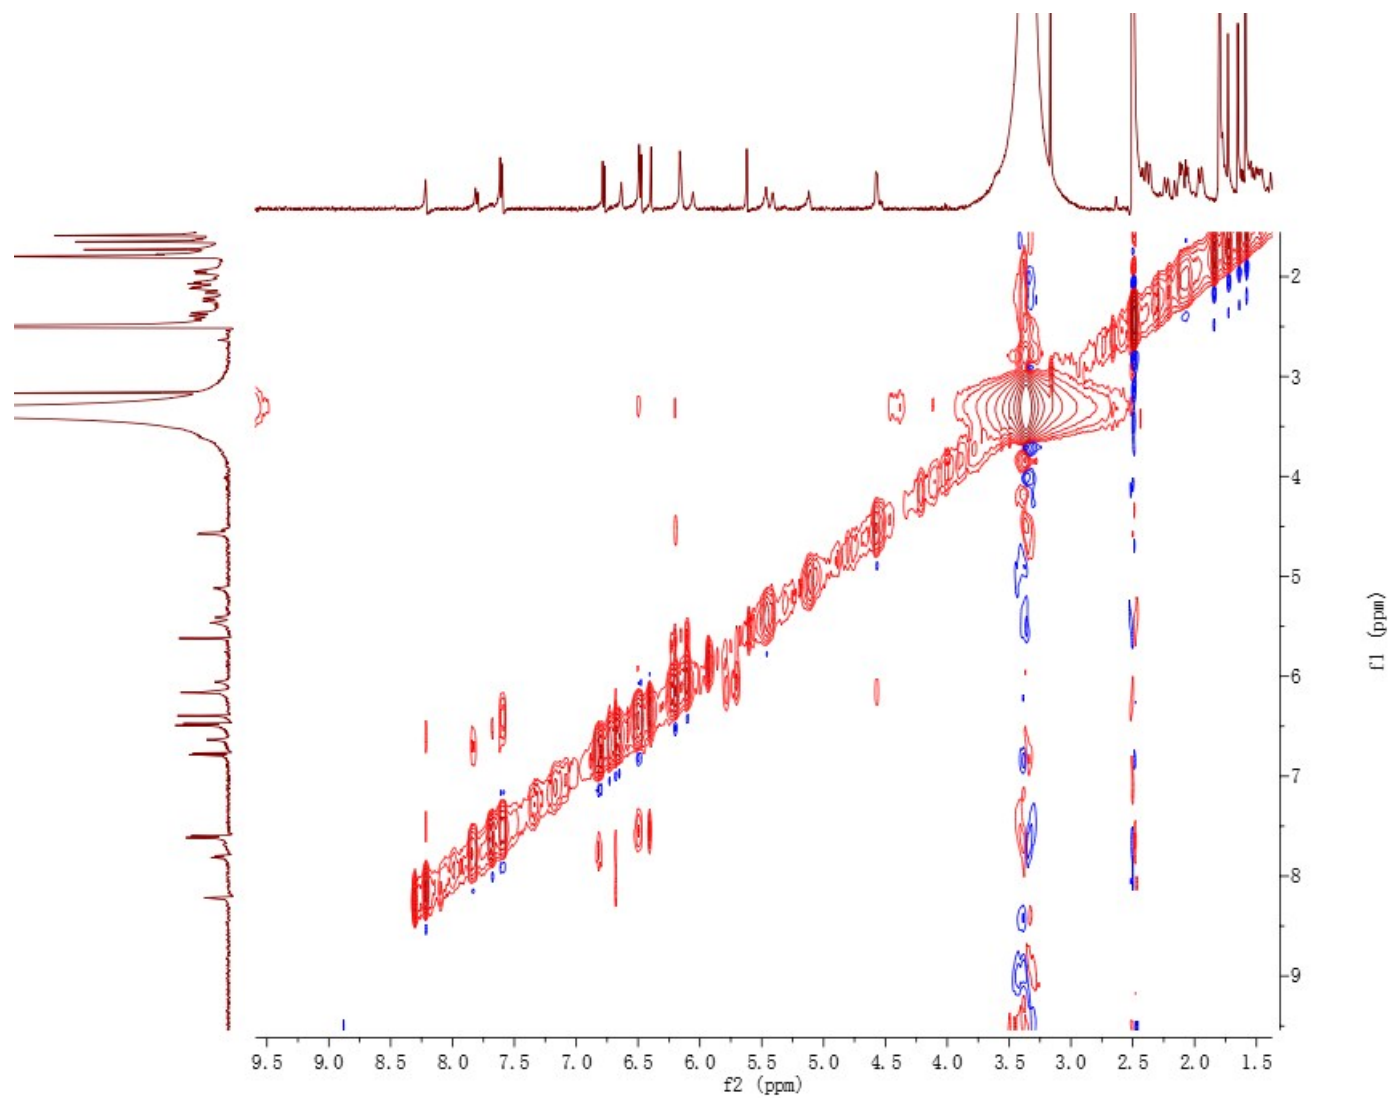

Figure S22: NOESY spectrum of **3a** in DMSO- $d_6$  (400 MHz).

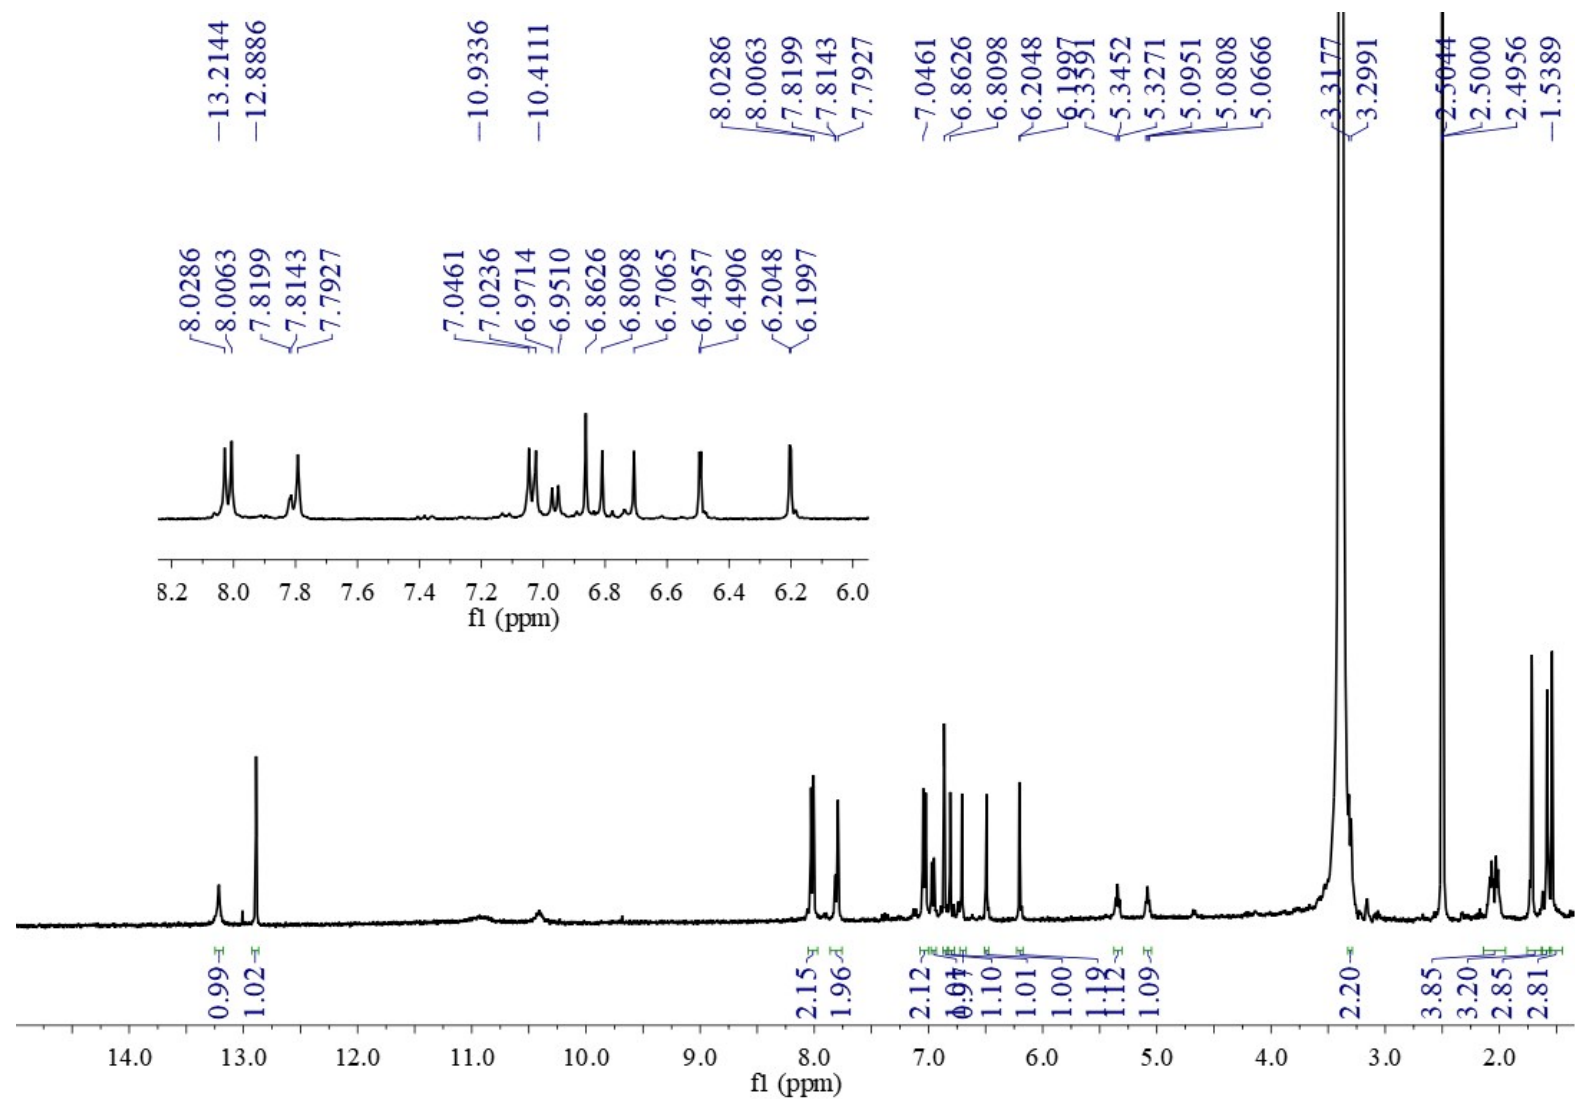

Figure S23:  $^1\text{H}$  NMR spectrum of **4a** in  $\text{DMSO-}d_6$  (400 MHz).

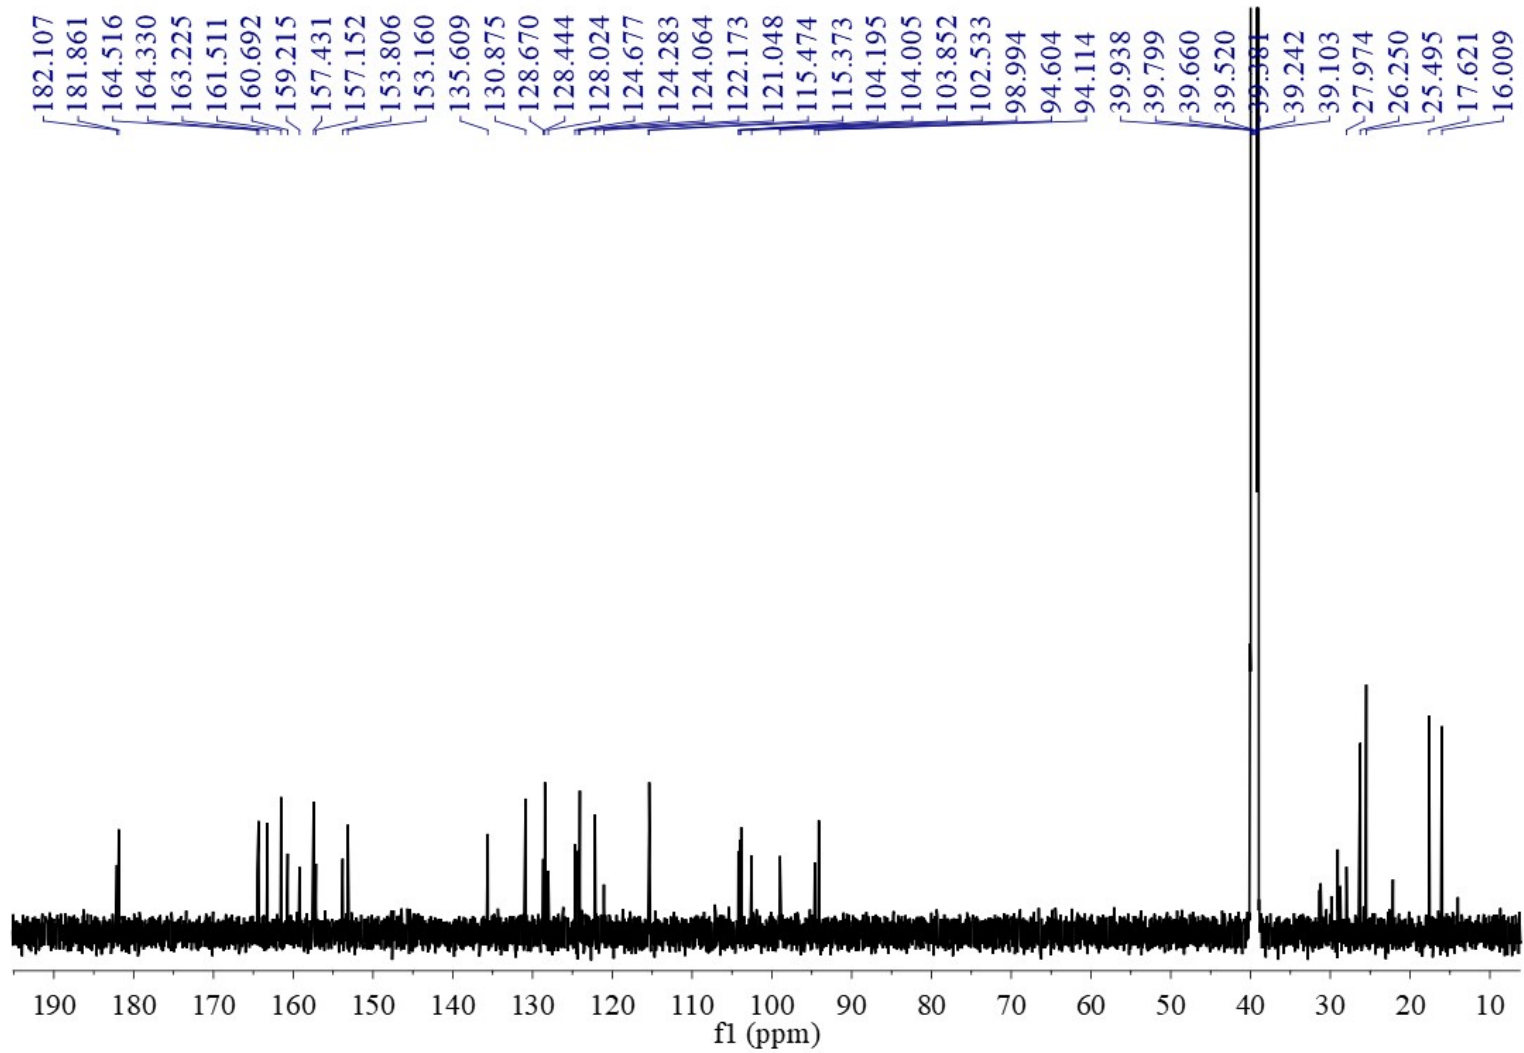

Figure S24:  $^{13}\text{C}$  NMR spectrum of **4a** in  $\text{DMSO-}d_6$  (600 MHz).



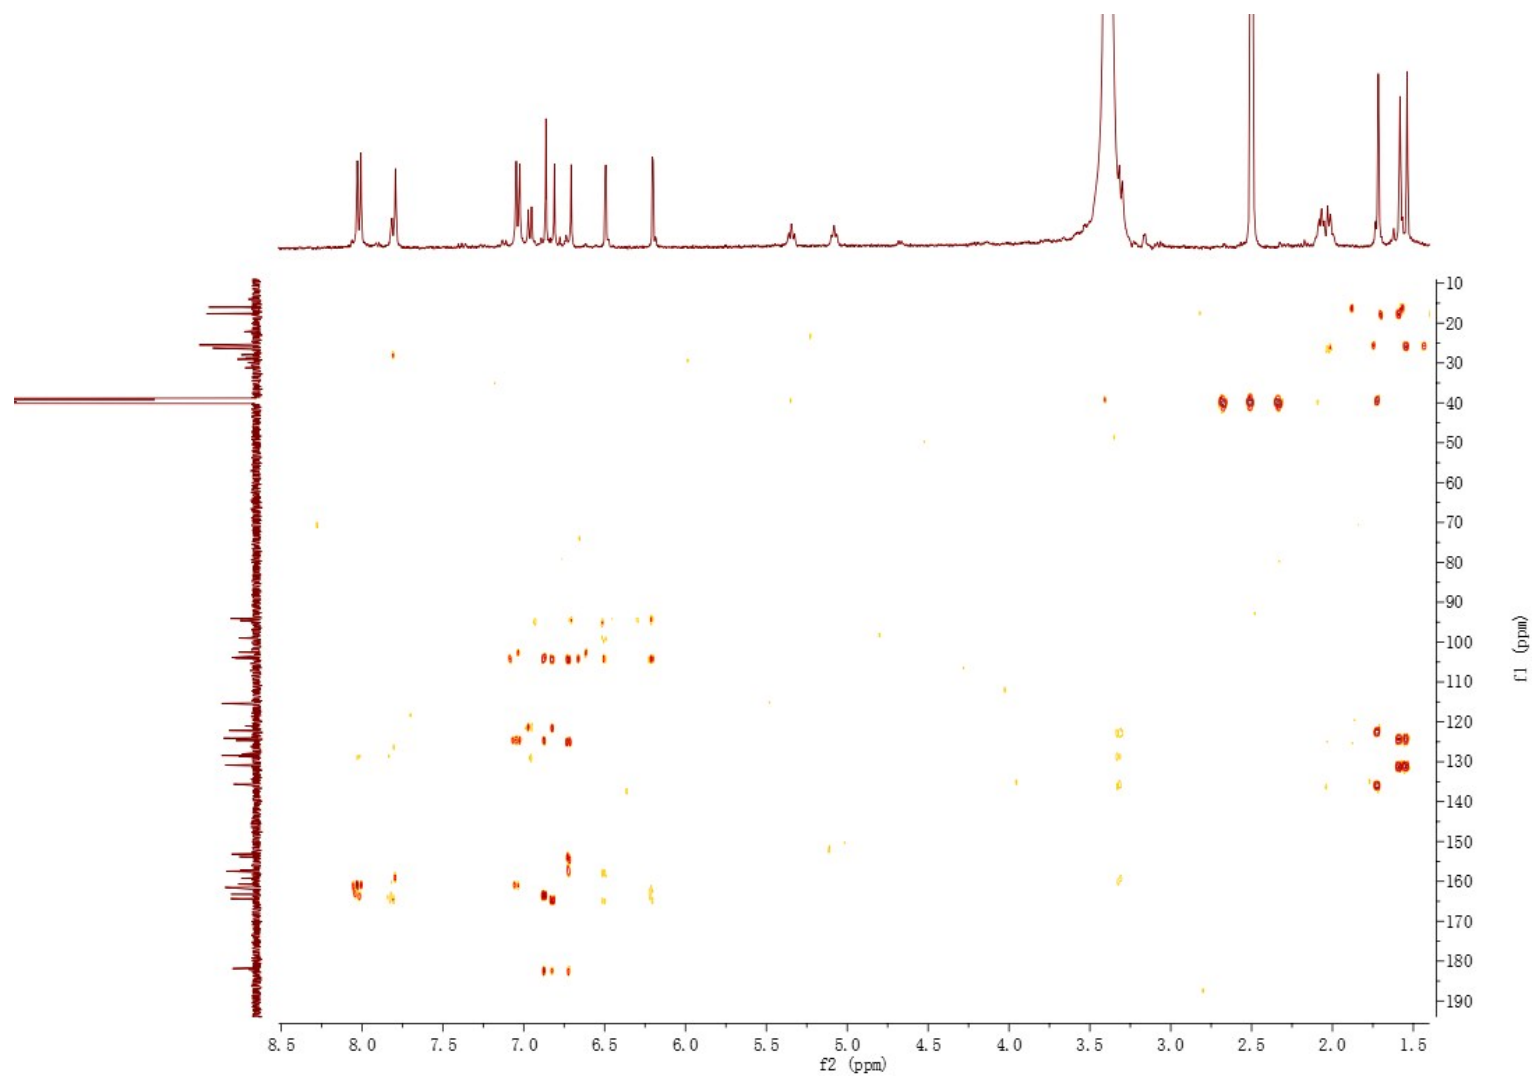

Figure S25: HMBC spectrum of **4a** in DMSO-*d*<sub>6</sub> (400 MHz).

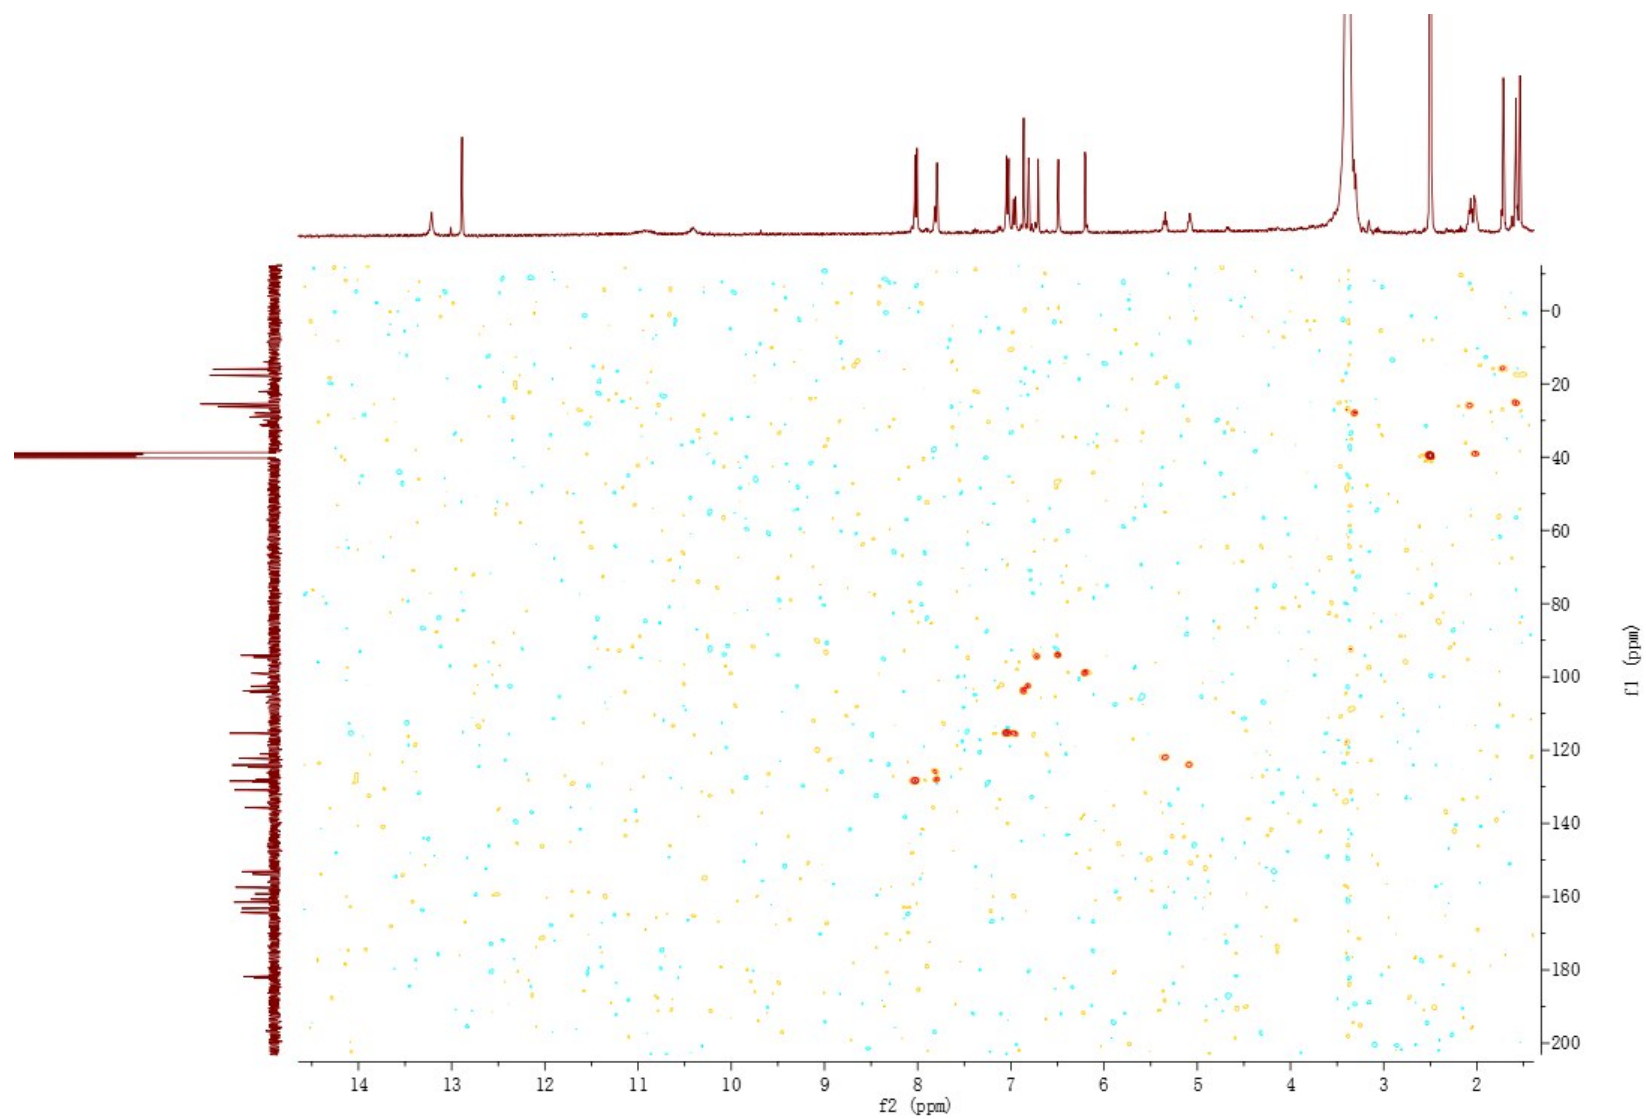

Figure S26: HSQC spectrum of **4a** in DMSO- $d_6$  (500 MHz).

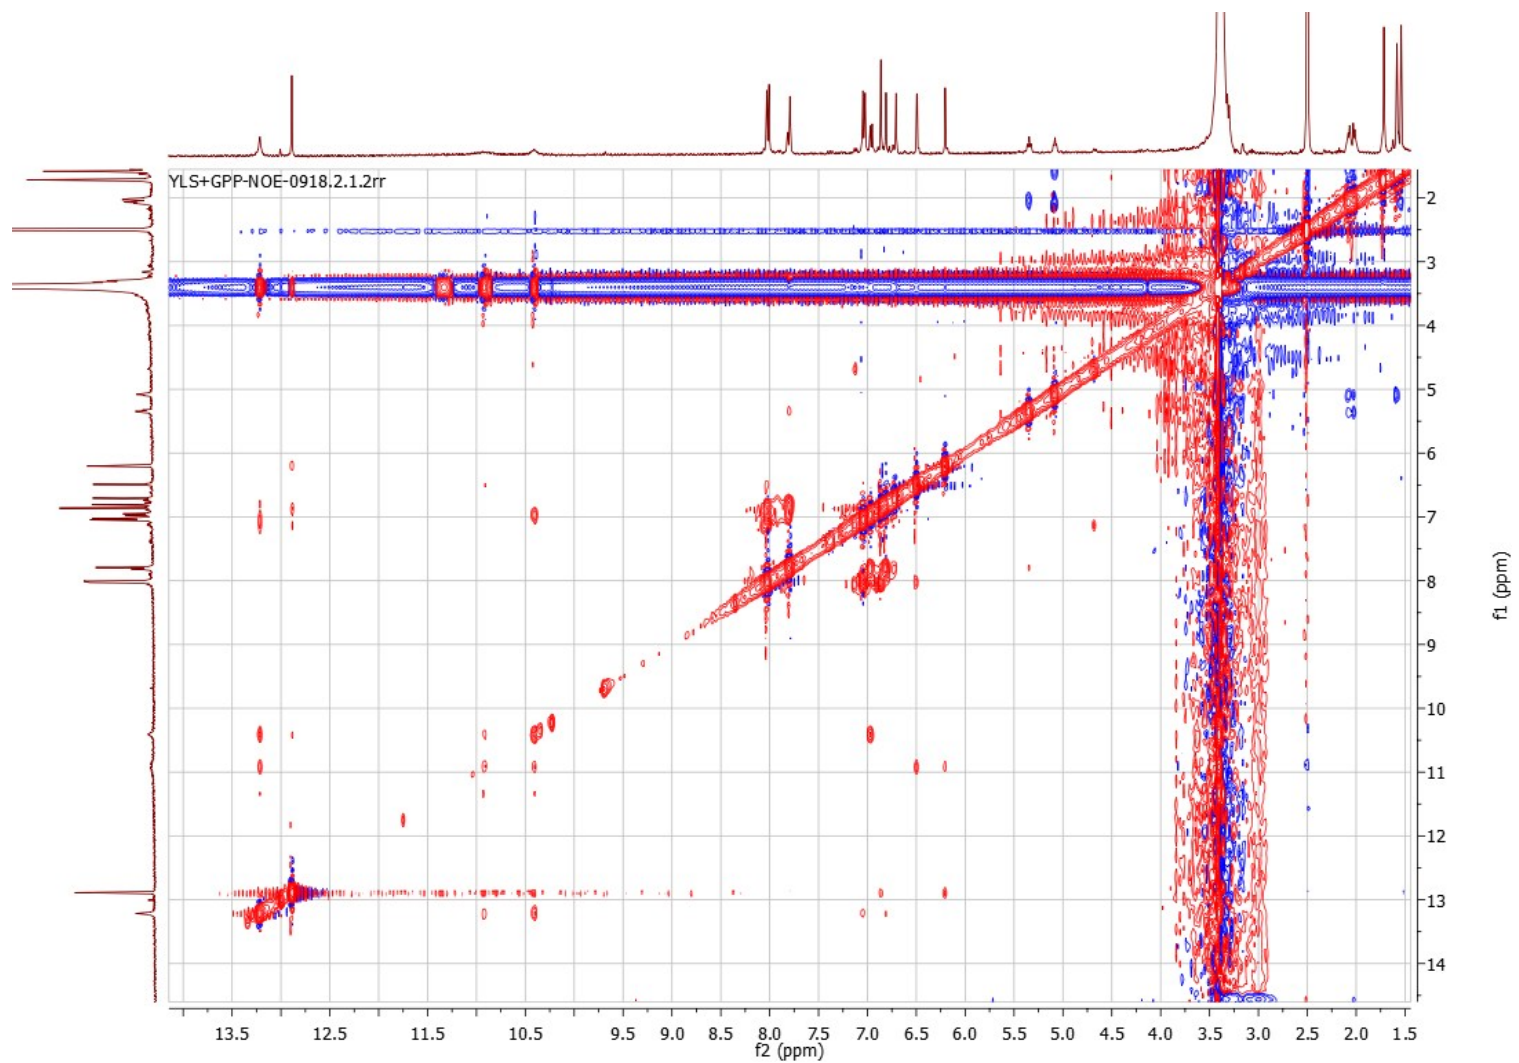

Figure S27: NOESY spectrum of **4a** in DMSO-*d*<sub>6</sub> (500 MHz).

## Reference

1. A. B. Woodside, Z. Huang and C. D. Poulter, *Org. Synth.*, 1988, **66**, 211-215.
